1 SARS-CoV-2 Variant Delta Potently Suppresses Innate Immune Response and  
2 Evades Interferon-Activated Antiviral Responses

3

4

5

6 Dixit Tandel<sup>1,2</sup>, Vishal Sah<sup>1,2</sup>, Nitesh Kumar Singh<sup>1</sup>, Poojitha Sai Potharaju<sup>1,2</sup>, Divya  
7 Gupta<sup>1</sup>, Sauhard Shrivastava<sup>1,3</sup>, Divya Tej Sowpati<sup>1,2</sup>, and Krishnan H Harshan<sup>1,2, €</sup>

8

9

10 <sup>1</sup>CSIR-Centre for Cellular and Molecular Biology, Hyderabad, India 500007

11 <sup>2</sup>Academy for Scientific and Innovative Research (AcSIR), Ghaziabad, India-201002

12 <sup>3</sup>Indian Institute of Science Education and Research, Bhopal, India-462066

13

14

15

16 €Correspondence: [hkrishnan@ccmb.res.in](mailto:hkrishnan@ccmb.res.in)

17

18 Keywords: SARS-CoV-2, COVID-19, Variants, Delta, RLR pathway, Innate Antiviral

19

20

21

22

23

24

25

26

27

28

29

30

31

32

33

34

35

36

37 **ABSTRACT**

38 Delta variant of SARS-CoV-2 has caused more severe infections than its previous  
39 variants. We studied the host innate immune response to Delta, Alpha and two  
40 earlier variants to map the evolution of the recent ones. Our biochemical and  
41 transcriptomic studies reveal that Alpha and Delta have progressively evolved over  
42 the ancestral variants by silencing innate immune response, thereby limiting cytokine  
43 and chemokine production. Though Alpha silenced RLR pathway just as Delta, it  
44 failed to persistently silence the innate immune response unlike Delta. Both Alpha  
45 and Delta have evolved to resist IFN treatment while they are still susceptible to RLR  
46 activation, further highlighting the importance of RLR-mediated, IFN-independent  
47 mechanisms in restricting SARS-CoV-2. Our studies reveal that SARS-CoV-2 Delta  
48 has integrated multiple mechanisms to silence host innate immune response and  
49 evade IFN response. Delta's silent replication and sustained suppression of host  
50 innate immune response, possibly resulting in delayed or reduced intervention by the  
51 adaptive immune response, could potentially contribute to the severe symptoms and  
52 poor recovery index associated with it.

53 **INTRODUCTION**

54 SARS-CoV-2, the causative virus behind the current COVID-19 pandemic has been  
55 evolving since its first detection in humans in 2019 (1), generating newer variants  
56 with higher infectivity (2). Delta (B.1.617.2), a dominant variant of concern (VOC)  
57 with higher severity (3, 4), had successfully outgrown the other variants (5), and  
58 caused several breakthrough infections (6). The newest VOC, Omicron, has caused  
59 major waves of infection across the world, but with significantly lower severity than  
60 Delta (7, 8). Before Delta, Alpha (B.1.1.7), another VOC, had higher transmissibility  
61 than its contemporary variants (3). Though variants such as Beta (B.1.351), and

62 Gamma (P.1) were considered as potential VOCs at one point in time, they failed to  
63 dominate across the world. Immune evasion by the new variants against the  
64 antibodies generated against the previous variants or vaccines is natural during viral  
65 evolution and has been the case for Delta (9, 10). Though a trade-off between the  
66 virulence and transmissibility has been evident in several viral infections, there are  
67 exceptions as well (11). It is unclear if the subsequent SARS-CoV-2 variants have  
68 been adapting in humans causing more benign infections.

69 It is now fairly understood that the humoral immune escape coupled with increased  
70 transmissibility are important factors for a particular variant to gain dominance in the  
71 pandemic (12). Increased transmissibility is rendered by a number of factors  
72 including enhanced entry and better survival. Epithelial cells in the respiratory and  
73 intestinal systems are permissive to SARS-CoV-2 both *in vitro* and *in vivo* (13).  
74 Innate immune response instructs the adaptive response through cytokines,  
75 chemokines, and antigen presentation (14). By far, there is no conclusive evidence  
76 of a productive infection of immune cells by SARS-CoV-2 (15, 16). Cytokine storm  
77 that has been implicated in the severe COVID-19 symptoms (17, 18) is an outcome  
78 of excessive secretion of pro-inflammatory cytokines first secreted by the epithelial  
79 cells and, in response by DC and other immune cells. Since viremia is not prominent  
80 in COVID-19 unlike in blood-borne viral diseases (19), the importance of the infected  
81 epithelial cells in triggering the adaptive responses is significant.

82 RLR pathway constitutes an important network recognizing double stranded RNA  
83 (dsRNA) intermediates of RNA viruses (20). Both RLR and TLR pathways are  
84 significantly impaired or delayed in COVID-19 patients (21-23) and validated in  
85 epithelial culture models (24, 25), contributing to COVID pathogenicity (18).

86 Production of type-I IFNs and subsequent activation of JAK-STAT pathway are

87 targeted by viral proteins and Alpha variant has evolved better mechanisms to evade  
88 innate response (25, 26). With a hypothesis that the newer and more successful  
89 variants are better in suppressing the innate responses, we investigated the details  
90 of RLR pathway activation in response to five different variants of SARS-CoV-2,  
91 including Delta. Our results demonstrate a steady progression in the capabilities of  
92 the subsequent variants over their previous ones in either delaying or efficiently  
93 suppressing innate immune response. Delta suppressed the host response  
94 pathways RLR-IFN and JAK-STAT most successfully and also resisted IFN  
95 treatment. Gene expression analysis uncovered that Delta suppressed host  
96 response in general including all major innate immune response pathways much  
97 more profoundly than Alpha, which itself was evidently more advanced than the  
98 previous variants. These suggested that Delta has been able to replicate in the host  
99 without alerting the innate signal pathways and this could possibly have resulted in  
100 delayed activation of adaptive response. Our findings could be important in the ever-  
101 changing contexts of COVID-19 symptoms and intervention strategies in addition to  
102 providing important clues to the evolutionary dynamics of SARS-CoV-2.

## 103 **RESULTS**

### 104 **Delta genomic RNA has high replicative fitness in culture, but generates low** 105 **infectious viral titers**

106 Since Delta and Alpha variants had higher infectivity in the populations, we decided  
107 to compare their replicative and infectious fitness with the earlier variant isolates in  
108 time-course experiments in Caco2 cells. Previous studies have demonstrated that  
109 Caco2 cells are highly permissive to SARS-CoV-2 (13). In a comparative analysis,  
110 both lung epithelial cell line Calu3 and Caco2 showed comparable permissivity to  
111 SARS-CoV-2 (Supplementary Figures 1 A and B). Further, IRF3 phosphorylation at

112 S396 residue in response to 1 MOI of SARS-CoV-2 infection was evident in Caco2  
113 (as shown in the upcoming section), but not in Calu3 (Supplementary Figure 2), thus  
114 suggesting better suitability of Caco2 culture in our studies described in the following  
115 sections. S396 phosphorylation has been demonstrated to promote IRF3 nuclear  
116 translocation (27). Colon epithelium is a target of SARS-CoV-2, and intestinal  
117 distress being a major symptom in COVID-19, the choice of Caco2 is relevant to this  
118 study. Cells were infected with 1 MOI of five different SARS-CoV-2 variant isolates  
119 (B.6, B.1.1.8, B.1.36.29, B.1.1.7 (Alpha), and B.1.617.2 (Delta)) for up to 72 hpi, and  
120 the cellular and supernatant viral RNA titers and infectious titers were measured.  
121 Genetic variation among these variants has been depicted in Figure 1A. B.6 is an  
122 isolate of A3i clade that was prominent during the early part of the pandemic while  
123 B.1.1.8 belongs to A2a clade that diverged with a characteristic D614G conversion in  
124 Spike (S). B.1.36.29, another isolate of A2a clade, several cases of which was  
125 reported in India, has additional characteristic N440K mutation in the RBD of S.  
126 Intracellular RNA analysis revealed that Delta replicated most efficiently right from 24  
127 to 72 hpi (Figure 1B), followed by Alpha, B.1.36.29, B.1.1.8, and B.6 in that order.  
128 Viral RNA levels in the supernatant followed similar trend (Figure 1C). However, the  
129 infectious titer data differed from the replication data where Delta displayed the least  
130 titers with B.1.36.29, and Alpha attaining the highest titers followed by B.1.1.8, and  
131 B.6 (Figure 1D). Thus, the higher rate of RNA replication of Delta did not translate  
132 into high infectious fitness. The relatively lower infectious titers of Delta also  
133 suggested that viral load may not be a major factor behind its higher transmissivity.  
134 Interestingly, spike (S) and nucleocapsid (N) immunoblots revealed that Alpha, and  
135 B.1.36.29 follow a pattern of high levels of S and N (Figure 1E) that correlated with

136 their infectious titers, indicating that the higher availability of the structural proteins  
137 could be a determining factor in their higher infectious titers.

### 138 **RLR and JAK-STAT are activated by early variants, but not by Delta**

139 We next analyzed RLR mediated innate response to SARS-CoV-2 variants. IRF3  
140 phosphorylation, a good measure of RLR activation, was activated by B.6 and  
141 B.1.1.8 variants by 48 hpi and continued until 72 hpi in Caco2 cells (Figure 2A).  
142 Though substantially delayed as reported elsewhere, the definite activation clearly  
143 suggested that the cells are able to overcome the suppression imposed early on by  
144 the virus. However, Alpha, Delta, and B.1.36.29 successfully inhibited IRF3  
145 phosphorylation throughout 72 hpi, indicating that they have employed additional  
146 mechanisms to completely silence RLR activation. *IFNB1* expression at 24 hpi was  
147 limited to B.6 infection (Figure 2B) whereas by 48 hpi, strong induction was also  
148 found in B.1.1.8. A modest induction was visible in B.1.36.29 infection at 48 hpi.  
149 Phenomenal induction of *IFNL1* by B.6 and B.1.1.8 right from 24 hpi and at moderate  
150 levels by Alpha indicated that it is regulated distinctly from *IFNB1* (Figure 2C).  
151 Intriguingly, Delta caused considerable induction of *IFNL1* at 24 hpi, that faded  
152 progressively with time. The induction of *IFNB1* and *IFNL1* in the absence of IRF3  
153 phosphorylation suggested that they are activated by IRF3-independent mechanisms  
154 during SARS-CoV-2 infection. B.1.36.29 most successfully suppressed both *IFNB1*  
155 and *IFNL1* activation. STAT1 phosphorylation in B.6 and B.1.1.8 infections by 24 hpi  
156 confirmed IFN-mediated activation of JAK-STAT pathway (Figures 2 A and D). Alpha  
157 infection delayed STAT1 phosphorylation till 72 hpi while Delta induced a modest  
158 and steady phosphorylation since 24 hpi. IFIT1 and its transcript levels closely  
159 mirrored STAT1 phosphorylation (Figures 2 A, E, and F). Similar inductions of MDA5  
160 and its transcript *IFIH1* (Figure 2 G and H respectively), and *DDX58* transcripts

161 (Figure 2I) further confirmed a strong activation of ISGs in B.6 and B.1.1.8 infections,  
162 and modest induction in Alpha, but insignificant in Delta and B.1.36.29 infections.

163 These results indicated that the earlier variants indeed caused delayed RLR  
164 activation, but the later variants Alpha and Delta, in that order, progressively gained  
165 better mechanisms to effectively silence it. It is intriguing though that B.1.36.29 that  
166 suppressed RLR response more efficiently than Alpha had emerged well before it,  
167 but could not become a dominant variant.

168 **Delta and Alpha evade IFN response, but are partially susceptible to RLR**  
169 **activation by poly (I:C)**

170 Our results clearly demonstrated that B.6, B.1.1.8 and Alpha have progressively  
171 developed capabilities to delay RLR and IFN signaling pathways whereas Delta, and  
172 B.1.36.29 are further evolved to silence the responses throughout the infection time-  
173 course. The activation of RLRs by their ligands is dependent on their post-  
174 translational modification (28) and hence could be a potential target for suppression  
175 by Delta. We asked if Delta could evade the prior activation of RLR pathway where  
176 previously activated RLR pathway would be suppressed by its infection. Caco2 cells  
177 transfected with poly (I:C) for 12 h were infected with the variants for 24 h (Figure  
178 3A). We have described in the earlier section that 24 h infection caused a moderate  
179 increase in STAT1 phosphorylation in B.6 and B.1.1.8 infections (Figures 2 A and D)  
180 and hence this timeframe would be ideal to study the impact of RLR activation. While  
181 the induction of *IFNB1* confirmed the activation of RLR following poly (I:C) (Figure  
182 3C), treatment, STAT1 phosphorylation (Figures 3 B and D) accompanied by  
183 elevated IFIT1 and MDA5 levels (Figures 3 B, E, and F) indicated the activation of  
184 JAK-STAT pathways. Though poly (I:C) augmented STAT1 phosphorylation in B.6  
185 infection, its extent was masked by the higher basal level of phosphorylation caused

186 by the infection (Figures 3 B and D). A similar masking was also seen in *IFNB1*  
187 levels in B.6 infection (Figure 3C) that caused robust *IFNB1* activation at 24 hpi  
188 (Figure 2B). Interestingly, STAT1 phosphorylation at 36 h post-poly (I:C) transfection  
189 in the mock-infected samples was comparable with the those that were similarly  
190 transfected and infected by B.6 (Figure 3B, lanes 3 and 5 respectively), suggesting  
191 that poly (I:C) transfection resulted in the saturation of STAT1 phosphorylation. The  
192 treatment resulted in appreciable drop in N levels in B.6, B.1.1.8, and B.1.36.29  
193 infections, but not in Alpha and Delta variants (Figures 3 B). Poly (I:C) inhibited RNA  
194 replication of all variants (Figure 3G), indicating that genomic RNA replication of all  
195 SARS-CoV-2 variants are susceptible to the prior activation of RLR pathway.  
196 However, poly (I:C) had only partial impact on the infectious titers of Alpha and Delta  
197 while the other variants were susceptible (Figure 3H). These results clearly indicated  
198 that early activation of RLR pathway prior to infection is efficient enough to restrict  
199 SARS-CoV-2 but the later variants are able to partially overcome this restriction.  
200 We then studied the sensitivity of SARS-CoV-2 variants to type-I IFN. Though  
201 SARS-CoV-2 proteins are shown to intercept STAT1 phosphorylation leading to its  
202 inactivation, IFNs are also shown to restrict SARS-CoV-2 replication (24, 29). IFN- $\alpha$   
203 treatment of Caco2 cells (Figure 4A) activated JAK-STAT pathway, evident from  
204 increased STAT1 phosphorylation (Figures 4 B and C) and elevated levels of IFIT1  
205 and MDA5 (Figures 4 B, D, and E). The treatment brought about considerable  
206 reduction in N levels in B.6, B.1.1.8, and B.1.36.29, but not in Alpha and Delta  
207 infections (Figures 4 B). IFN- $\alpha$  treatment caused significant drop in viral RNA titers in  
208 B.6, B.1.1.8, and B.1.36.29, but much less for Alpha and Delta infections, with Delta  
209 displaying the highest resistance (Figure 4F). Infectious titers of B.6, B.1.1.8, and  
210 B.1.36.29 were also significantly lower upon IFN- $\alpha$  treatment, but not much of Alpha



211 and Delta (Figure 4G), indicating that the latter two variants have acquired resistance  
212 to IFN- $\alpha$  signaling, but are susceptible to RLR pathway activation. These results  
213 also suggest that the poly (I:C)-mediated restriction of SARS-CoV-2 is less  
214 dependent on IFN pathways, but uses non-canonical mechanisms against which  
215 SARS-CoV-2 has not gained resistance. Collectively our results indicated a gradual  
216 and independent evolution of mechanisms to resist IFN-dependent and independent  
217 antiviral mechanisms by the recent SARS-CoV-2 variants.

### 218 **Gene expression profiling reveals strong inactivation of antiviral pathways by** 219 **Delta**

220 We analyzed the time-course transcriptional reprogramming (TR) following infections  
221 by individual variants of SARS-CoV-2 except B.1.36.29 in Caco2 cultures. B.1.36.29  
222 infection was not included as this variant lacked the advanced feature of IFN  
223 resistance and was not a prominent variant in circulation. Principal component  
224 analysis (PCA) confirmed that the biological replicates clustered together and  
225 maximum variance was observed for B.6 and B.1.1.8 followed by Alpha from the  
226 controls while Delta showed the least variations (Figure 5A). This suggests strong  
227 host transcriptional response to B.6, B.1.1.8 and Alpha, but not to Delta. We further  
228 performed differential expression analysis for the four variants against control, to  
229 identify significantly regulated genes (FDR < 0.05 and absolute log<sub>2</sub> fold change >  
230 1). The number of differentially expressed genes (DEGs) suggests that B.6 caused  
231 the sharpest response followed by B.1.1.8 and Alpha in that order (Figure 5B). Alpha  
232 caused a comparable scale of TR at 72 hpi, but was significantly delayed compared  
233 to B.6 and B.1.1.8, indicating a better control of host response by this variant. Since  
234 IRF3 phosphorylation remained muted, and *IFNB1* and *IFNL1* levels were uninduced  
235 even at 72 hpi by Alpha (Figures 2A-C), this late surge of host response is likely to

236 have been coordinated by IFN-independent mechanisms. Unlike B.6, B.1.1.8, and  
237 Alpha infections, Delta caused steady, benign TR throughout the time-course,  
238 suggesting that these variants have been able to effectively contain multiple  
239 surveillance mechanisms of the host and thus have a stricter control over host  
240 responses (Figures 5B). This trend of progressive delay in the host responses to  
241 B.1.1.8, and Alpha, and the mild response to Delta indicated that the lately emerged  
242 variants have better mechanisms to evade the host surveillance than their earlier  
243 variants. Interestingly, the overall distribution of DEGs fold-change by Alpha  
244 remained much lower than those from B.6 and B.1.1.8 (Figure 5C). Highest  
245 distribution for B.6 and B.1.1.8 was found at 48 hpi while for Alpha, it was seen at 72  
246 hpi, confirming that Alpha has evolved to delay the innate immune response,  
247 probably not to evade it totally. Unlike in the case of other variants, the distribution of  
248 DEGs fold-change was maintained throughout the time-course in Delta infection,  
249 suggesting that it is able to tightly suppress the host response. Analysis of the  
250 consolidated DEGs for the variants indicates that the TR imprint of Alpha resembled  
251 more with those of B.6 and B.1.1.8 than it did with Delta, while that of Delta  
252 overlapped closely with both B.6 and Alpha (Figure 5D). GO analysis of the  
253 consolidated DEGs demonstrated a strong enrichment of genes participating in  
254 antiviral response for the up-regulated genes in B.6, B.1.18, and Alpha infections,  
255 but not in Delta (Figure 5E). Further, mononuclear differentiation, and leukocyte  
256 migration factors were strongly enriched in B.6, B.1.18, and Alpha infections, as  
257 compared to Delta, indicating that Delta infection does not alarm the adaptive  
258 immune response (Figures 5E), particularly from 48 hpi (Supplementary Figure 3A).  
259 Stronger enrichment of DEGs from 48 hpi underlined the delayed response to  
260 SARS-CoV-2. KEGG analysis identified substantially reduced enrichment of genes

261 involved in cytokine-chemokine, NF- $\kappa$ B, TNF, NLR, and PI3K-AKT signaling  
262 pathways in Delta infection as compared with B.6, B.1.1.8 and Alpha infections  
263 (Figures 5F, and Supplementary Figure 3B). Among the down-regulated genes in  
264 B.6, B.1.1.8, and Alpha infections, enrichment was found for processes involved in  
265 fatty acid metabolism, and lipid localization particularly beyond 48 hpi, indicating  
266 unique associations of Delta with the host-derived membranous compartment  
267 (Figures 5G, and Supplementary Figure 4A). Membrane components being very  
268 critical for SARS-CoV-2 life-cycle, their metabolism is modulated by the viruses for  
269 their benefit. Interestingly, nucleotide and alcohol metabolism were also down-  
270 regulated by these variants. Though B.6 and Delta infections caused transcriptional  
271 downregulation of a number of genes at 24 hpi (Figure 5C), no significant functional  
272 enrichment was observed for these genes from Delta samples (Supplementary  
273 Figures 4 A and B). KEGG enrichment analysis showed a Delta-specific  
274 downregulation of a small set of components of pro-inflammatory IL-17 and TNF  
275 signaling pathways, and cytokine-cytokine interaction, late in infection (Figure 5H,  
276 and Supplementary Figure 4B), indicating that Delta not just spares cytokine  
277 induction, but inhibits it at the later stages of infection. The progressively depleting  
278 proportion of the regulated genes shared by B.6 with B.1.1.8, Alpha, and Delta in  
279 that order indicated a continuing divergence of the evolving variants from the earliest  
280 variant B.6 (Supplementary Figure 5A). Only a small fraction of DEGs across all  
281 time-points overlapped among the four infections to form a common pool of  
282 commonly regulated genes (261 up- and 57 down-regulated), indicating the unique  
283 transcription profiles generated by the individual variants (Supplementary Figures  
284 5A, 6A, and 6B). Among the 261 commonly up-regulated genes, significant  
285 enrichment was seen for antiviral response processes in GO analyses

286 (Supplementary Figure 5B). Lack of enrichment for genes uniquely associated with  
287 individual variants indicated that the functional significance of a significant proportion  
288 of DEGs cannot be ascertained for each of the variants (Supplementary Figures 5 B  
289 and D). The commonly down-regulated genes (Supplementary Figure 5D) did not  
290 form any enrichment while those from B.6, B.1.1.8, and Delta formed individual  
291 enrichment groups (Supplementary Figures 5 C and E). Delta caused the lowest  
292 magnitudes of gene activation and suppression among the common set of DEGs  
293 across the variants. (Supplementary Figures 6 A and B).

294 **Delta infection causes more intense and persistent subversion of cytokines,**  
295 **chemokines, and antigen presentation genes than Alpha**

296 Delta not only caused a low-grade TR of antiviral genes, but lower quantum as well  
297 (Figure 6 A and B) maintaining a steady profile with no major changes during the  
298 time-course, further suggesting that they have developed capabilities to persistently  
299 silence the response. The violin plot considered 822 genes classified under various  
300 processes contributing to innate immune response, response to cytokine, defense  
301 response, type-I IFN pathway, and leukocyte activation and differentiation. In line  
302 with our earlier data, only a small set of genes were reprogrammed by Delta infection  
303 (Figures 6A). Within a select subset of these genes, Delta specifically down-  
304 regulated several antiviral genes of interest such as *OASL*, *NLRC5*, *IFNL2* and  
305 *IFNL3* at 72 hpi (Figure 6B). Down-regulated genes in Delta also enriched for  
306 cytokine receptor interaction, TNF and IL-17 signaling (Figure 6B and  
307 Supplementary Figure 4B), indicating the distinct influence of this variant on the host  
308 response. Alpha and Delta suppressed type-I IFN induction whereas B.6 and B.1.1.8  
309 induced *IFNB1* right from 24 hpi. Type-III IFNs, the early responding cytokines in  
310 epithelial cells, were detected early in B.6 and B.1.1.8 infections and later in Alpha

311 infection (*IFNL1*, *IFNL2* and *IFNL3*) at 48 hpi, thereby indicating that the late surge of  
312 TR in Alpha infection could partly be triggered by this class of IFNs (*IFNL2* and  
313 *IFNL3* in Figure 6B; *IFNL1* in Supplementary Figure 7). Consistent with these  
314 observations, ISG activation was also very limited in Delta infection (Supplementary  
315 Figures 7 and 8A). RLR and NLR pathway components were also significantly  
316 activated by B.6, and B.1.1.8, and to a moderate level by Alpha (Supplementary  
317 Figures 8B and 9A respectively). Absence of any appreciable activation of NF- $\kappa$ B by  
318 Delta as compared with the others was in agreement with the earlier observations  
319 (Supplementary Figure 9B). Intriguingly, despite a clear absence of both type-I and –  
320 III IFNs, a limited set of ISGs (*OAS2* and a few *IFITs*) were activated by Delta  
321 indicating the activation IFN-independent pathways (Figure 6B and Supplementary  
322 Figure 7). Pro-inflammatory chemokines *CCL4* and *IL-6* that promote cytokine storm  
323 were activated only by B6 and B.1.1.8 (Figure 6B and Supplementary Figures 8 and  
324 10), indicating that the magnitude of cytokine storm in Delta infections could be much  
325 smaller than that by the earlier variants. However, TNF- $\alpha$  expression was detected in  
326 Delta infection (Figure 6B, Supplementary Figures 9B and 10C), albeit late and  
327 milder than the previous variants, indicating that its regulation is independent from  
328 that of *CCL4* and *IL-6*. These data, agreeing with the immunoblot data (Figures 1  
329 and 2) confirm that the lately emerged variants have evolved mechanisms to  
330 suppress both type-I and –III IFN, as well as cytokine and chemokine activations.  
331 Additionally, antigen presentation was also compromised in Delta infection. A study  
332 had previously reported the inhibition of activation of MHC Class-I pathways by  
333 SARS-CoV-2 where they analyzed the results until 24 hpi (30). We detected similar  
334 results, but found their activation at later hours of infection. While the regulators  
335 *NLRC5*, *IRF1* and *STAT1*, and *HLA-B* were progressively activated through the

336 infection time-course in B.6 and B.1.1.8 infections, they were hardly detected in  
337 Delta infection (Figure 6C, and Supplementary Figures 7E and 10). Collectively, our  
338 results demonstrate that Delta infection causes very mild response from the host  
339 cells thereby possibly resulting in a delayed or milder activation of adaptive immune  
340 response.

## 341 **DISCUSSION**

342 Viral infections are studied from the perspective of virulence and transmissibility,  
343 which often share diffused borders. Studies on viral virulence have often been  
344 impeded with theoretical and empirical studies running in parallel. Recent  
345 developments in the sequence determination of variants have given better insight  
346 into the process of viral and virulence evolution (11). Traditional wisdom suggests  
347 that the virulence caused by a pathogen in a new host would be tempered over a  
348 period of their co-existence driven by natural selection.  $R_0$ , the pathogen fitness  
349 index, is proportionate to the ratio of transmission rate and the sum of the mortality  
350 and recovery rates. Though a trade-off between the virulence and transmission rate  
351 is often observed during the evolution of the relationship with the host, it may not be  
352 necessary (11, 31). In this study, we attempted to comprehensively characterize how  
353 the new variants that emerged during the pandemic timescale have evolved with the  
354 host from the point of the host-response to these individual variants. Our study in  
355 SARS-CoV-2 infected cells clearly demonstrates a spectrum of host response  
356 triggered by distinct viral variants where the earliest one B.6 caused the quickest,  
357 while the latest one Delta caused the most benign response. The responses against  
358 the other two variants were indications of the measured progression of the virus to a  
359 more benign variant (Figure 7). The variants emerged later have evolved better  
360 mechanisms to delay and to silence the innate response than their previous ones,

361 facilitating their longer stay in the infected host. By this criterion, they can be  
362 identified as more evolved. This trait is likely to improve with the newer dominant  
363 variants emerging after Delta, such as Omicron. It is evident that suppression of  
364 innate immunity and resistance to IFN were achieved through distinct mechanisms.  
365 Our findings have important implications on the therapeutic approaches involving  
366 IFN therapy against the emerging variants.

367 Recent report on the evolution of Alpha to evade innate immune response more  
368 efficiently than its previous variants (25) was also captured in our studies as we did  
369 detect substantially elevated levels of N proteins in Alpha infections. Absence of  
370 overlapping mutations shared by Alpha, and Delta (Supplementary 11) indicates  
371 divergent mechanisms adopted by these variants to achieve similar outcomes.

372 Clearly, they must have targeted the innate sensing pathways RLR and TLR  
373 uniquely. A much delayed, but strong host antiviral response against Alpha despite  
374 the induction of RLR pathway and *IFNB1* production indicated the involvement of  
375 alternate mechanisms that Delta was able to successfully suppress. In one such  
376 case, Delta was able to suppress the modest IFN-independent STAT1  
377 phosphorylation and activation that was found in Alpha infections (Figures 2A, and  
378 7). Minimal activation of *ISG15* by Alpha and Delta indicated that its suppression  
379 might be assisting these variants in lowering the ISGylation of its target molecules  
380 that are important mediators of innate immune response (Supplementary Figure  
381 10G). Interestingly, despite a complete absence of IRF3 phosphorylation during  
382 Alpha infection, the host response exploded between 24-72 hpi, suggesting that this  
383 response is not orchestrated by IFNs.

384 Our studies also set a platform for further discussions on the larger question of the  
385 features that make a particular variant more transmissible. Though Delta RNA

386 replication was the fastest in agreement with the existing literature (9), its infectious  
387 titers were lower than the previous variants, an indication that silencing the host  
388 response does not appear to provide it any particular advantage in terms of its viral  
389 load. However, silencing the innate response would be important from the point of  
390 view of the response of the host. With a reported higher  $R_0$  for Delta (32), there lacks  
391 a credible clinical data on its relative virulence compared with the previous variants  
392 in immunologically naïve populations. Delta indeed caused severe pathology during  
393 its emerging period while the majority population was unvaccinated. Currently, it  
394 appears highly improbable to conduct unbiased population studies on its severity  
395 due to the unavailability of immunologically naïve cohorts, as would the case of  
396 Omicron and future variants (33) . Based on our data, we could speculate that the  
397 contribution by the epithelial cells to the systemic responses could be significantly  
398 lower in persons infected by Delta as compared to its previous counterparts. A  
399 reduced communication from the epithelial cells would also result in lower adaptive  
400 response thus causing lower chances of cytokine storm. However, Delta-specific  
401 data on cytokine storm is lacking. At the same time, the absence of support from the  
402 adaptive immune response could result in persistent infection resulting in a more  
403 severe pathological damage in the respiratory and intestinal tissues. Long-term  
404 presence of active SARS-CoV-2 in patients is an indication of such a strategy (34).  
405 Whether this scenario contributed to higher cases of respiratory sickness associated  
406 with Delta infection needs further investigation. Higher incidences respiratory support  
407 and ICU admissions were reported in Delta prevalent regions, indicating that the lung  
408 could have been subject to more serious damage.

409 One potential criticism against our study could possibly be that these studies were  
410 not performed in human primary epithelial cells. However, the major objective of our



411 study was to map the evolving trend of innate immune escape by the emerging  
412 variants and hence we needed a system that responds to the earlier variants. Animal  
413 models such as ACE2 transgenic mice and Syrian hamsters are also not natural  
414 hosts of SARS-CoV-2 and hence may not be a good choice to study the viral  
415 evolution as in the case of Influenza (35). Caco2, being colon epithelial cells of  
416 human origin and being highly permissive, have allowed us to study our objective  
417 thoroughly. The results from these studies could be of great significance in  
418 characterizing the ever-evolving nature of COVID-19.

## 419 **METHODS**

### 420 **Cell culture, poly (I:C) transfection and IFN- $\alpha$ treatment**

421 Vero (CCL-81) cells were purchased from Sigma-Aldrich cultured in complete  
422 Dulbecco's modified eagle medium (cDMEM; Gibco) containing 10% Fetal bovine  
423 serum (FBS; Hyclone), and 1 $\times$  penicillin-streptomycin cocktail (Gibco) at 37°C and  
424 5% CO<sub>2</sub>. Caco2, purchased from ATCC, were grown similarly, but supplemented  
425 with 20% FBS. Cells were continuously passaged at 70-80% confluency and were  
426 maintained in a condition of ambient temperature and humidity.  
427 Poly (I:C) transfections were performed as in previous report (36). Cells were seeded  
428 to reach 80% confluency. Transfection mix containing OptiMEM-Lipofectamine 3000-  
429 poly (I:C) was prepared according to manufacturer's protocol and added to cells and  
430 incubated for 6 h. Later, the transfection mix was replaced with cDMEM and further  
431 incubated for 6 h. 12 h later, the transfected cells were infected with virus for 3 h and  
432 further incubated in fresh cDMEM until harvested for analyses.  
433 For IFN- $\alpha$  treatment, cells were seeded to reach 80-85% confluency. Cells were  
434 supplemented with serum-free DMEM (SFD) for 2h for serum starvation. Later, SFD  
435 was replaced with fresh SFD containing 500U/mL IFN- $\alpha$  for 2h. Following this, the

436 cells were infected for 3 h as earlier and incubated further with fresh cDMEM  
437 containing either PBS (vehicle) or 1000 U/mL (PBL Assay Science) of IFN- $\alpha$  and  
438 incubated for 24 h. Cells were harvested and used for RNA or protein work.

#### 439 **SARS-CoV-2 isolates**

440 Five variant isolates of SARS-CoV-2 used in this study were isolated (30) at the  
441 Centre for Cellular and Molecular Biology in the biosafety level-3 facility. Their  
442 genomes were sequenced (GISAID ID: EPI\_ISL\_458067; virus name- hCoV-  
443 19/India/TG-CCMB-O2/2020 (B.6), EPI\_ISL\_458046; virus name- hCoV-  
444 19/India/TG-CCMB-L1021/2020 (B.1.1.8), GISAID ID: EPI\_ISL\_539744; virus name-  
445 hCoV-19/India/TG-CCMB-AC511/2020 (B.1.36.29), GISAID ID: EPI\_ISL\_1672391.2;  
446 virus name- hCoV-19/India/TG-CCMB-BB649-P1/2020 (B.1.1.7), GISAID ID:  
447 EPI\_ISL\_2775201; virus name- hCoV-19/India/TG-CCMB-CIA4413/2021 (Delta).  
448 The viruses were propagated in Vero (CCL-81) cells grown in SFD.

#### 449 **Virus Infection, quantification, and titration**

450 Caco2 cells were infected at 1 MOI for 3 h in SFD after which the inoculum was  
451 replaced with complete media and further grown until harvesting. Supernatants  
452 collected were processed for RNA preparation using Nucleospin Viral RNA isolation  
453 kit (Macherey-Nagel GmbH & Co. KG), and infectious titer assay (plaque formation  
454 assay (PFA)). qRT-PCR to quantify SARS-CoV-2 RNA was performed on Roche  
455 LightCycler 480 using nCOV-19 RT-PCR detection kit from Q-line Molecular.  
456 Infectious titers of the supernatants were calculated using PFA as mentioned  
457 previously (37). The viral supernatants were serially diluted to prepare inocula that  
458 were inoculated on cultured Vero cells. Post-infection the monolayers were  
459 immobilized by soft-agar medium and further incubated until the plaque were formed.  
460 Plaques formed from the replicates were counted, extrapolated to 1 mL volume by

461 applying the dilution factor, averaged, and represented in plaque forming unit/mL  
462 (PFU/mL).

### 463 **Real-time quantitative RT-PCR**

464 Cellular RNA samples were prepared using MN Nucleospin RNA kit (Takara). Equal  
465 quantities of RNA were reverse transcribed using Primescript Reverse transcriptase  
466 (Takara) following the manufacturer's protocol. 50 ng of cDNA was used for  
467 quantification using SYBR Green mastermix (Takara) on Lightcycler 480 instrument  
468 (Roche). Transcripts of the host origin were normalized against GAPDH. Relative  
469 fold-changes between the experimental and control samples ( $2^{(-\Delta\Delta C_t)}$ ) were calculated  
470 by represented in the graphs.

### 471 **Antibodies and immunoblotting**

472 All primary antibodies were purchased from Cell Signaling Technologies except the  
473 anti-Spike antibody (Novus Biologicals), and anti-Nucleocapsid, anti-Tubulin and  
474 anti-GAPDH (Thermo Fisher) antibodies. HRP-conjugated secondary antibodies was  
475 purchased from Jackson ImmunoResearch. Protein pellets were lysed in an NP-40  
476 lysis buffer as described earlier (36). Protein quantification was done using BCA  
477 method (G Biosciences). The immunoblots were developed on a BioRad Chemidoc  
478 MP system using ECL reagents (ThermoFisher and G Biosciences). Quantification  
479 was performed using ImageJ.

### 480 **Next generation sequencing**

481 Library preparation was done using the MGIEasy RNA Library Prep Set (MGI)  
482 according to the manufacturer's instructions. In brief, 500 ng total RNA was used as  
483 starting material from which ribosomal RNA was depleted using Ribo-Zero Plus  
484 rRNA Depletion Kit (Illumina). The rRNA depleted samples were fragmented, reverse  
485 transcribed and the second strands were synthesised. DNA was then purified using

486 DNA Clean Beads provided in the kit followed by end repair and A-tailing. Barcoding  
487 and adaptor ligation were performed and the samples were purified. Samples were  
488 amplified using adaptor specific primers and quantified using Qubit dsDNA high  
489 sensitivity kit (Thermo Scientific). Sample fragment size was determined using 4200  
490 Tape Station (Agilent). The samples were denatured and single stranded circular  
491 DNA strands were generated. Further, rolling cycle amplification was performed to  
492 generate DNA nanoballs. The samples were subsequently loaded onto the flow cells  
493 (FCL) and sequenced at PE100.

#### 494 **Data Processing and Analysis**

495 MGI adapters and low-quality reads were removed from raw sequencing reads using  
496 Cutadapt (38). Reads with quality scores less than 20 and smaller than 36 bp were  
497 discarded. The processed reads were then mapped to the human genome GRCh38  
498 using Hisat2 with default parameters (39). Uniquely aligned reads were counted  
499 using feature Counts of Subread package (40). Count information was available for  
500 60683 genes in the gtf file, downloaded from Ensemble (41). Genes with total 10  
501 read counts across all the samples were removed resulting in 35906 genes for  
502 further analysis. Differential gene expression analysis was performed using DESeq2  
503 (42). Genes with adjusted p-value < 0.05 and absolute log<sub>2</sub> Fold change > 1 were  
504 considered differentially expressed. For PCA plot and heat map, the raw read counts  
505 were rlog normalized, available with the DESeq2 package.

#### 506 **Functional enrichment analysis**

507 Functional enrichment analysis was performed using clusterProfiler (43) for GO term  
508 and KEGG pathways enrichment. We only used the Biological process for GO term  
509 enrichment analysis. Similar enriched terms were further merged using the 'simplify'  
510 function of clusterProfiler with similarity cut-off set to 0.7. 'p.adjust' was used as a

511 feature to select representative terms and 'min' was used to select features. 'Wang'  
512 was used as a method to measure similarity. Top 10 GO terms and KEGG pathways  
513 based count of genes were plotted.

#### 514 **Statistical analysis**

515 Statistical significance was calculated by paired end, two-tailed Student's t-test  
516 method. All experiments were conducted minimum three independent rounds and  
517 averaged values are represented as scatter plot with bar graphs (depicting individual  
518 values of independent experiments). Error bars are representations of the mean  $\pm$   
519 SEM. All graphs were prepared using GraphPad Prism version 8.0.2. Statistical  
520 significance is represented as \*, \*\*, and \*\*\* for  $p < 0.05$ ,  $p < 0.01$  and  $p < 0.005$   
521 respectively.

#### 522 **Data availability**

523 RNAseq data was deposited into GEO database under accession number  
524 GSE193122.

#### 525 **Institutional biosafety**

526 Institutional biosafety clearance was obtained for the experiments pertaining to  
527 SARS-CoV-2.

528 **Institutional ethics clearance:** Institutional ethics clearance (IEC-82/2020) was  
529 obtained for the patient sample processing for virus culture.

#### 530 **Author contributions**

531 D.T. and K.H.H. conceived and designed this study. D.T., V.S., S.P., and K.H.H.  
532 designed the experiments. D.T., V.S., S.P., D.G., and S.S. performed the  
533 experiments. N.K.S., D.T.S., and V.S. analysed the NGS data with assistance from  
534 D.T. K.H.H. wrote the manuscript with editing from D.T., and inputs from N.K.S. and  
535 D.T.S.

536

## 537 **Acknowledgement**

538 We thank CCMB COVID-19 testing facility, especially Karthik Bhardwaj and Archana  
539 Bhardwaj Siva for the access of viral VTMs. We thank Haripriya Parthasarathy for  
540 critical reading and her valuable suggestions. Special appreciation goes to Mohan  
541 Singh Moodu and Amit Kumar for their assistance with logistics.

## 542 **Funding**

543 The work was supported by the funding from the Council of Scientific and Industrial  
544 Research, Govt. of India (6/1/FIRST/2020-RPPBDD-TMD-SeMI) and partly by  
545 Science and Engineering Research Board, Govt. of India (IPA/2020/000070).

## 546 **REFERENCES**

547

- 548 1. Zhu N, Zhang D, Wang W, Li X, Yang B, Song J, et al. A Novel Coronavirus from Patients with  
549 Pneumonia in China, 2019. *The New England journal of medicine*. 2020;382(8):727-33.
- 550 2. Tang X, Wu C, Li X, Song Y, Yao X, Wu X, et al. On the origin and continuing evolution of  
551 SARS-CoV-2. *National science review*. 2020;7(6):1012-23.
- 552 3. Twohig KA, Nyberg T, Zaidi A, Thelwall S, Sinnathamby MA, Aliabadi S, et al. Hospital  
553 admission and emergency care attendance risk for SARS-CoV-2 delta (B.1.617.2) compared with  
554 alpha (B.1.1.7) variants of concern: a cohort study. *The Lancet Infectious Diseases*. 2022;22(1):35-42.
- 555 4. Butt AA, Dargham SR, Chemaitelly H, Al Khal A, Tang P, Hasan MR, et al. Severity of Illness in  
556 Persons Infected With the SARS-CoV-2 Delta Variant vs Beta Variant in Qatar. *JAMA internal  
557 medicine*. 2022;182(2):197-205.
- 558 5. Mishra S, Mindermann S, Sharma M, Whittaker C, Mellan TA, Wilton T, et al. Changing  
559 composition of SARS-CoV-2 lineages and rise of Delta variant in England. *EClinicalMedicine*.  
560 2021;39:101064.
- 561 6. Wang SY, Juthani PV, Borges KA, Shallow MK, Gupta A, Price C, et al. Severe breakthrough  
562 COVID-19 cases in the SARS-CoV-2 delta (B.1.617.2) variant era. *The Lancet Microbe*. 2022;3(1):e4-  
563 e5.
- 564 7. Wolter N, Jassat W, Walaza S, Welch R, Moultrie H, Groome M, et al. Early assessment of the  
565 clinical severity of the SARS-CoV-2 omicron variant in South Africa: a data linkage study. *The Lancet*.  
566 2022.
- 567 8. Madhi SA, Kwatra G, Myers JE, Jassat W, Dhar N, Mukendi CK, et al. South African Population  
568 Immunity and Severe Covid-19 with Omicron Variant. *medRxiv*. 2021:2021.12.20.21268096.
- 569 9. Mlcochova P, Kemp SA, Dhar MS, Papa G, Meng B, Ferreira I, et al. SARS-CoV-2 B.1.617.2  
570 Delta variant replication and immune evasion. *Nature*. 2021;599(7883):114-9.
- 571 10. Goldberg Y, Mandel M, Bar-On YM, Bodenheimer O, Freedman L, Haas EJ, et al. Waning  
572 Immunity after the BNT162b2 Vaccine in Israel. *The New England journal of medicine*.  
573 2021;385(24):e85.
- 574 11. Geoghegan JL, Holmes EC. The phylogenomics of evolving virus virulence. *Nature reviews  
575 Genetics*. 2018;19(12):756-69.

- 576 12. Bushman M, Kahn R, Taylor BP, Lipsitch M, Hanage WP. Population impact of SARS-CoV-2  
577 variants with enhanced transmissibility and/or partial immune escape. *Cell*. 2021;184(26):6229-  
578 42.e18.
- 579 13. Chu H, Chan JF, Yuen TT, Shuai H, Yuan S, Wang Y, et al. Comparative tropism, replication  
580 kinetics, and cell damage profiling of SARS-CoV-2 and SARS-CoV with implications for clinical  
581 manifestations, transmissibility, and laboratory studies of COVID-19: an observational study. *The*  
582 *Lancet Microbe*. 2020;1(1):e14-e23.
- 583 14. Iwasaki A, Medzhitov R. Control of adaptive immunity by the innate immune system. *Nature*  
584 *immunology*. 2015;16(4):343-53.
- 585 15. Schultze JL, Aschenbrenner AC. COVID-19 and the human innate immune system. *Cell*.  
586 2021;184(7):1671-92.
- 587 16. Boumaza A, Gay L, Mezouar S, Bestion E, Diallo AB, Michel M, et al. Monocytes and  
588 Macrophages, Targets of Severe Acute Respiratory Syndrome Coronavirus 2: The Clue for  
589 Coronavirus Disease 2019 Immunoparalysis. *The Journal of infectious diseases*. 2021;224(3):395-406.
- 590 17. Huang C, Wang Y, Li X, Ren L, Zhao J, Hu Y, et al. Clinical features of patients infected with  
591 2019 novel coronavirus in Wuhan, China. *Lancet (London, England)*. 2020;395(10223):497-506.
- 592 18. Yang L, Xie X, Tu Z, Fu J, Xu D, Zhou Y. The signal pathways and treatment of cytokine storm  
593 in COVID-19. *Signal transduction and targeted therapy*. 2021;6(1):255.
- 594 19. Hagman K, Hedenstierna M, Rudling J, Gille-Johnson P, Hammas B, Grabbe M, et al. Duration  
595 of SARS-CoV-2 viremia and its correlation to mortality and inflammatory parameters in patients  
596 hospitalized for COVID-19: a cohort study. *Diagnostic Microbiology and Infectious Disease*.  
597 2022;102(3):115595.
- 598 20. Rehwinkel J, Gack MU. RIG-I-like receptors: their regulation and roles in RNA sensing. *Nature*  
599 *reviews Immunology*. 2020;20(9):537-51.
- 600 21. Hadjadj J, Yatim N, Barnabei L, Corneau A, Boussier J, Smith N, et al. Impaired type I  
601 interferon activity and inflammatory responses in severe COVID-19 patients. *Science*.  
602 2020;369(6504):718-24.
- 603 22. Blanco-Melo D, Nilsson-Payant BE, Liu WC, Uhl S, Hoagland D, Møller R, et al. Imbalanced  
604 Host Response to SARS-CoV-2 Drives Development of COVID-19. *Cell*. 2020;181(5):1036-45.e9.
- 605 23. Galani IE, Rovina N, Lampropoulou V, Triantafyllia V, Manioudaki M, Pavlos E, et al. Untuned  
606 antiviral immunity in COVID-19 revealed by temporal type I/III interferon patterns and flu  
607 comparison. *Nature immunology*. 2021;22(1):32-40.
- 608 24. Lei X, Dong X, Ma R, Wang W, Xiao X, Tian Z, et al. Activation and evasion of type I interferon  
609 responses by SARS-CoV-2. *Nat Commun*. 2020;11(1):3810.
- 610 25. Thorne LG, Bouhaddou M, Reuschl AK, Zuliani-Alvarez L, Polacco B, Pelin A, et al. Evolution of  
611 enhanced innate immune evasion by the SARS-CoV-2 B.1.1.7 UK variant. *bioRxiv : the preprint server*  
612 *for biology*. 2021.
- 613 26. Xia H, Cao Z, Xie X, Zhang X, Chen JY, Wang H, et al. Evasion of Type I Interferon by SARS-  
614 CoV-2. *Cell reports*. 2020;33(1):108234.
- 615 27. Chen W, Srinath H, Lam SS, Schiffer CA, Royer WE, Jr., Lin K. Contribution of Ser386 and  
616 Ser396 to activation of interferon regulatory factor 3. *J Mol Biol*. 2008;379(2):251-60.
- 617 28. Chiang C, Gack MU. Post-translational Control of Intracellular Pathogen Sensing Pathways.  
618 *Trends in immunology*. 2017;38(1):39-52.
- 619 29. Schroeder S, Pott F, Niemeyer D, Veith T, Richter A, Muth D, et al. Interferon antagonism by  
620 SARS-CoV-2: a functional study using reverse genetics. *The Lancet Microbe*. 2021;2(5):e210-e8.
- 621 30. Yoo J-S, Sasaki M, Cho SX, Kasuga Y, Zhu B, Ouda R, et al. SARS-CoV-2 inhibits induction of  
622 the MHC class I pathway by targeting the STAT1-IRF1-NLRC5 axis. *Nature Communications*.  
623 2021;12(1):6602.
- 624 31. Ewald PW. Evolution of virulence. *Infectious disease clinics of North America*. 2004;18(1):1-  
625 15.

- 626 32. Liu Y, Rocklöv J. The reproductive number of the Delta variant of SARS-CoV-2 is far higher  
627 compared to the ancestral SARS-CoV-2 virus. *Journal of travel medicine*. 2021;28(7).
- 628 33. Bhattacharyya RP, Hanage WP. Challenges in Inferring Intrinsic Severity of the SARS-CoV-2  
629 Omicron Variant. *New England Journal of Medicine*. 2022.
- 630 34. Leitão IC, Calil PT, Galliez RM, Moreira FRR, Mariani D, Castiñeiras ACP, et al. Prolonged  
631 SARS-CoV-2 Positivity in Immunocompetent Patients: Virus Isolation, Genomic Integrity, and  
632 Transmission Risk. *Microbiology spectrum*. 2021;9(3):e0085521.
- 633 35. Oh DY, Hurt AC. Using the Ferret as an Animal Model for Investigating Influenza Antiviral  
634 Effectiveness. *Frontiers in microbiology*. 2016;7:80.
- 635 36. Vedagiri D, Gupta D, Mishra A, Krishna G, Bhaskar M, Sah V, et al. Retinoic Acid-Inducible  
636 Gene I-Like Receptors Activate Snail To Limit RNA Viral Infections. *Journal of virology*.  
637 2021;95(21):e0121621.
- 638 37. Gupta D, Parthasarathy H, Sah V, Tandel D, Vedagiri D, Reddy S, et al. Inactivation of SARS-  
639 CoV-2 by  $\beta$ -propiolactone causes aggregation of viral particles and loss of antigenic potential. *Virus*  
640 *research*. 2021;305:198555.
- 641 38. Martin M. Cutadapt removes adapter sequences from high-throughput sequencing reads.  
642 *EMBnet journal*. 2011;17(1):10-2.
- 643 39. Kim D, Paggi JM, Park C, Bennett C, Salzberg SL. Graph-based genome alignment and  
644 genotyping with HISAT2 and HISAT-genotype. *Nature Biotechnology*. 2019;37(8):907-15.
- 645 40. Liao Y, Smyth GK, Shi W. featureCounts: an efficient general purpose program for assigning  
646 sequence reads to genomic features. *Bioinformatics*. 2013;30(7):923-30.
- 647 41. Howe KL, Achuthan P, Allen J, Allen J, Alvarez-Jarreta J, Amode MR, et al. Ensembl 2021.  
648 *Nucleic acids research*. 2021;49(D1):D884-d91.
- 649 42. Love MI, Huber W, Anders S. Moderated estimation of fold change and dispersion for RNA-  
650 seq data with DESeq2. *Genome Biology*. 2014;15(12):550.
- 651 43. Wu T, Hu E, Xu S, Chen M, Guo P, Dai Z, et al. clusterProfiler 4.0: A universal enrichment tool  
652 for interpreting omics data. *The Innovation*. 2021;2(3):100141.

653  
654  
655  
656  
657  
658  
659  
660  
661  
662  
663  
664  
665  
666  
667  
668  
669  
670  
671



672 FIGURES  
673 Figure 1  
674

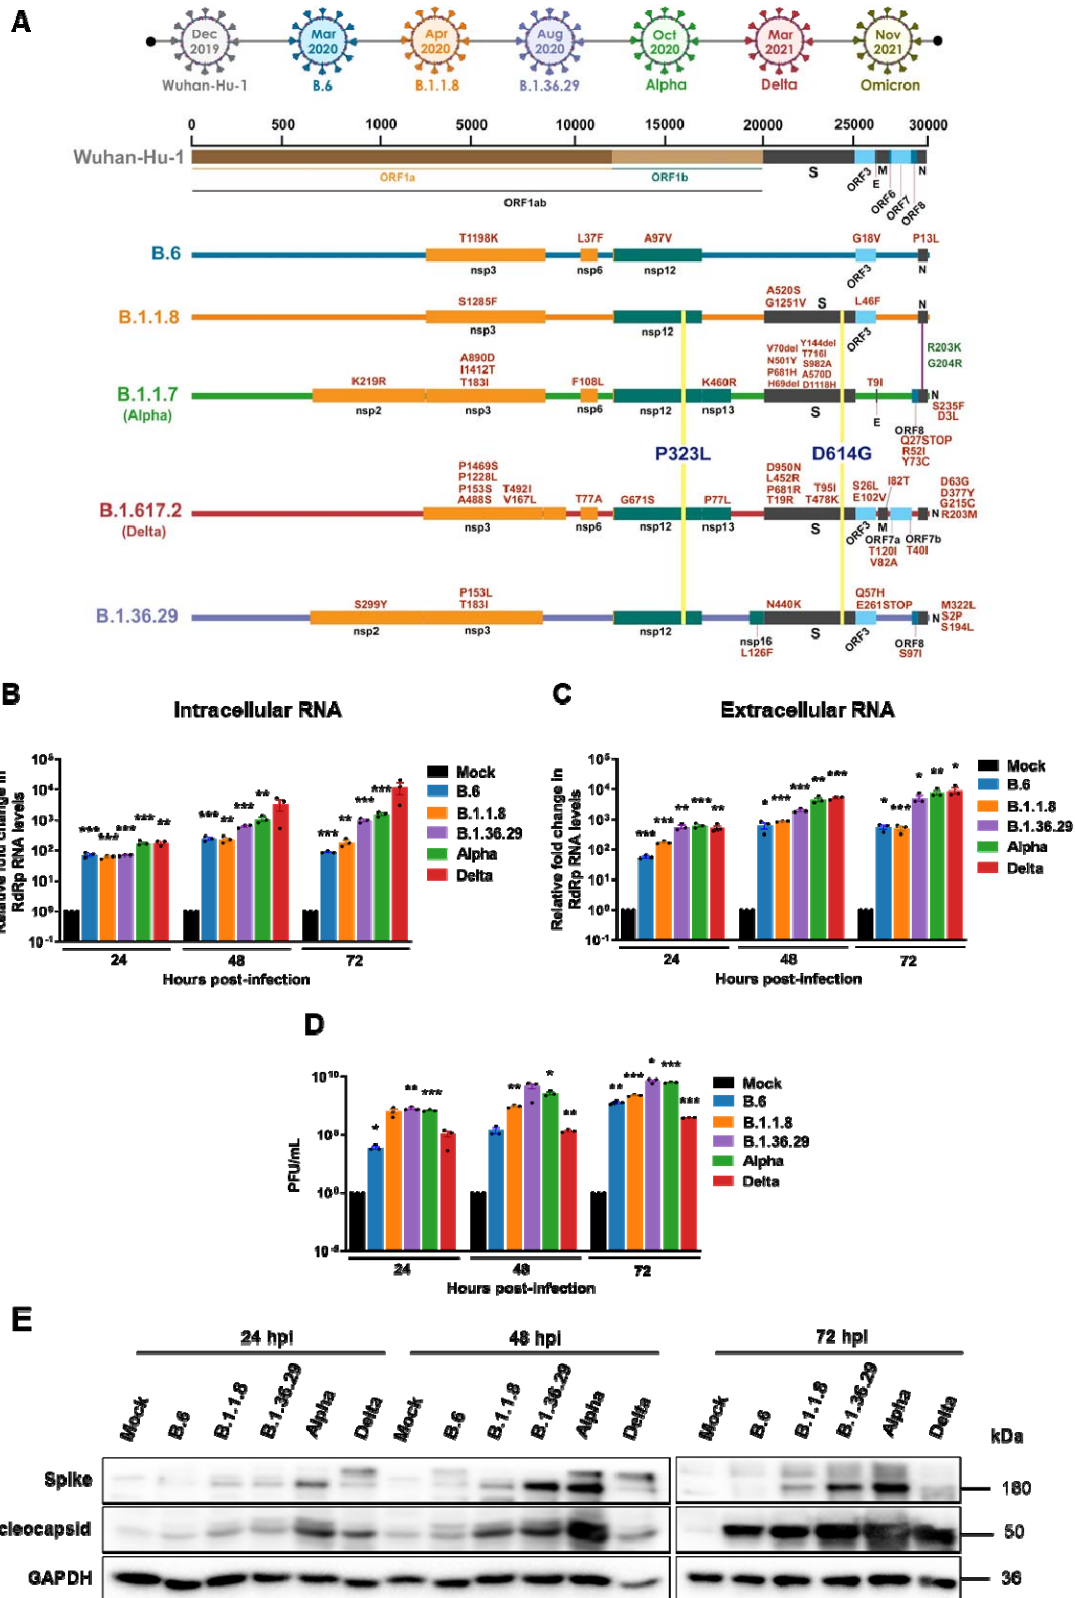

675

676 Figure 2  
677

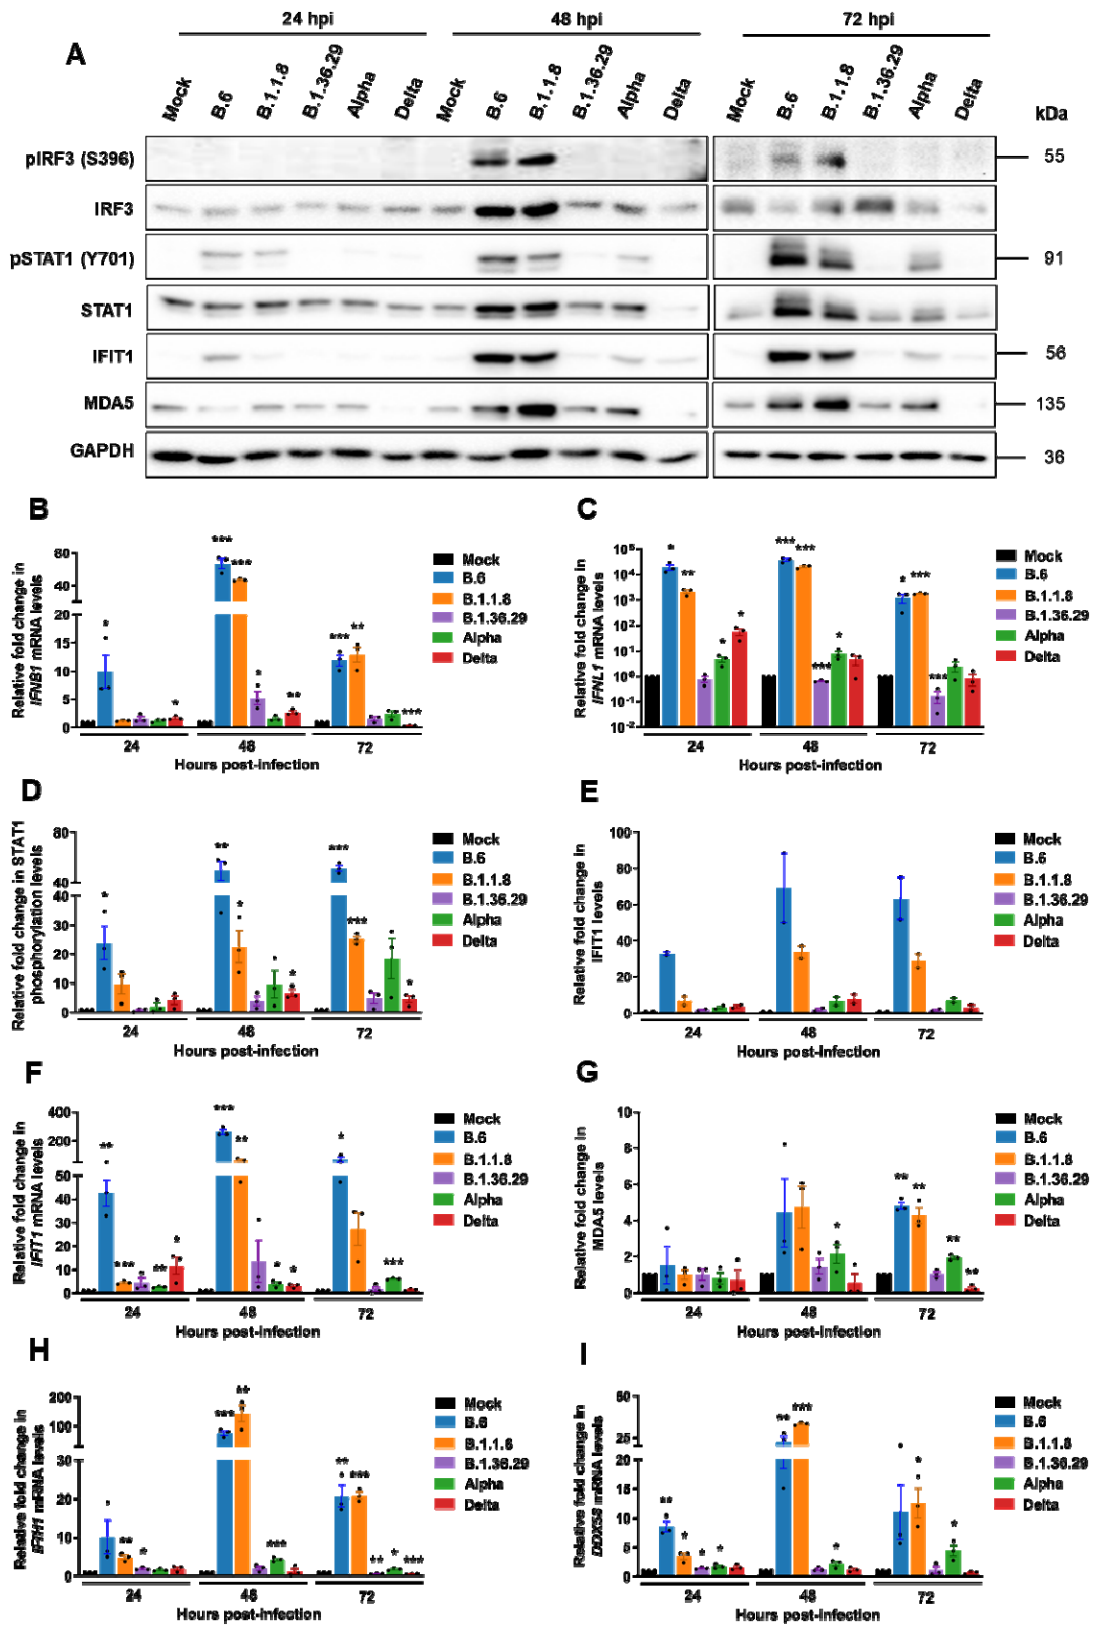

678  
679

680 Figure 3

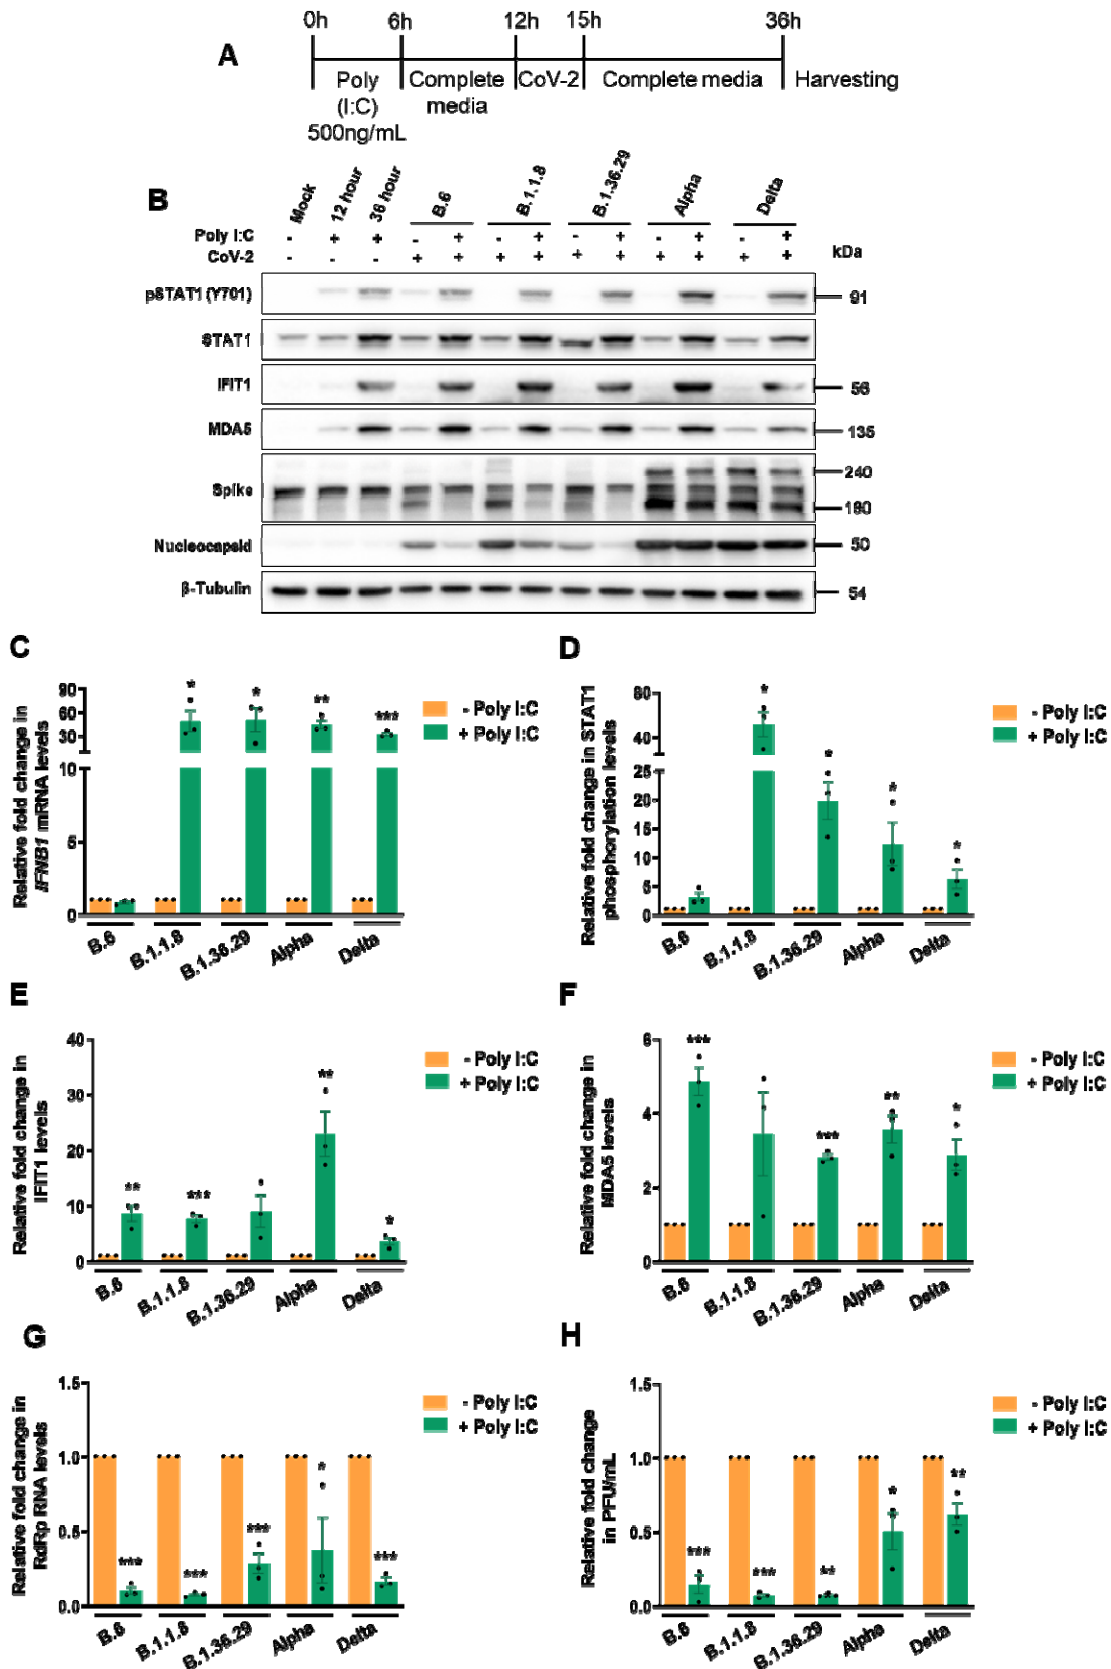

682 Figure 4

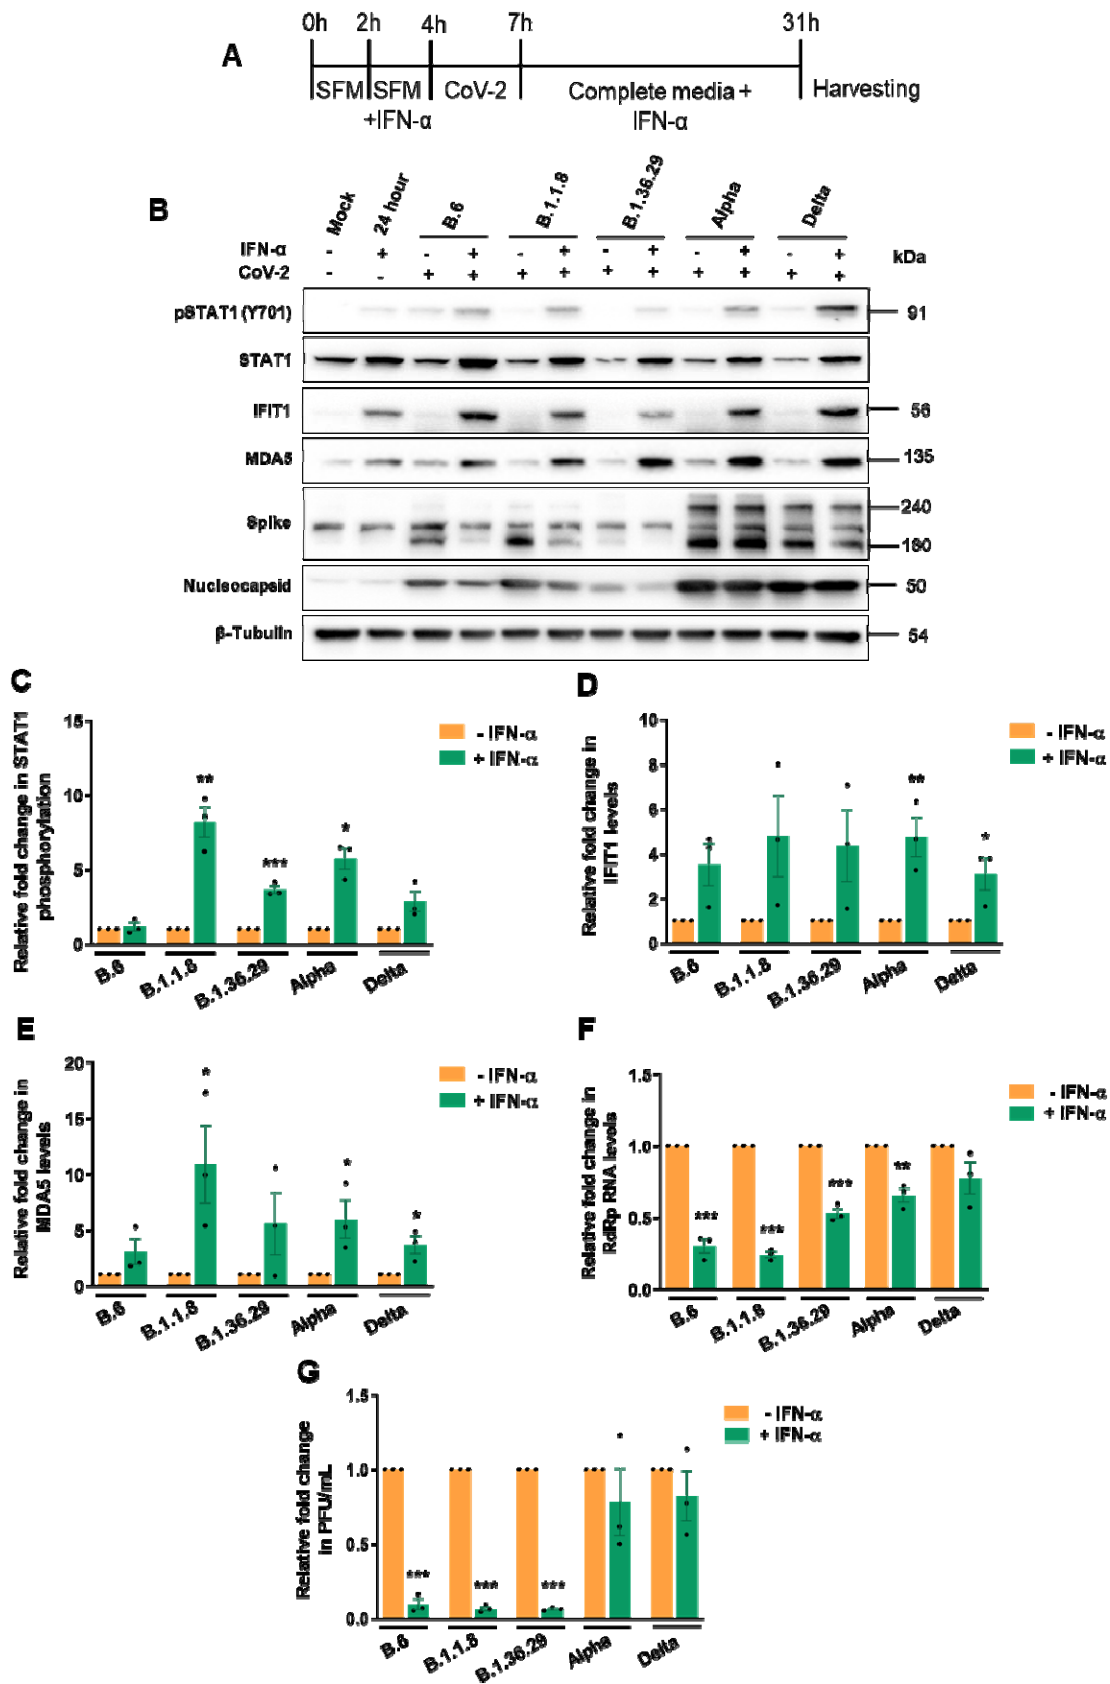

684 Figure 5  
685

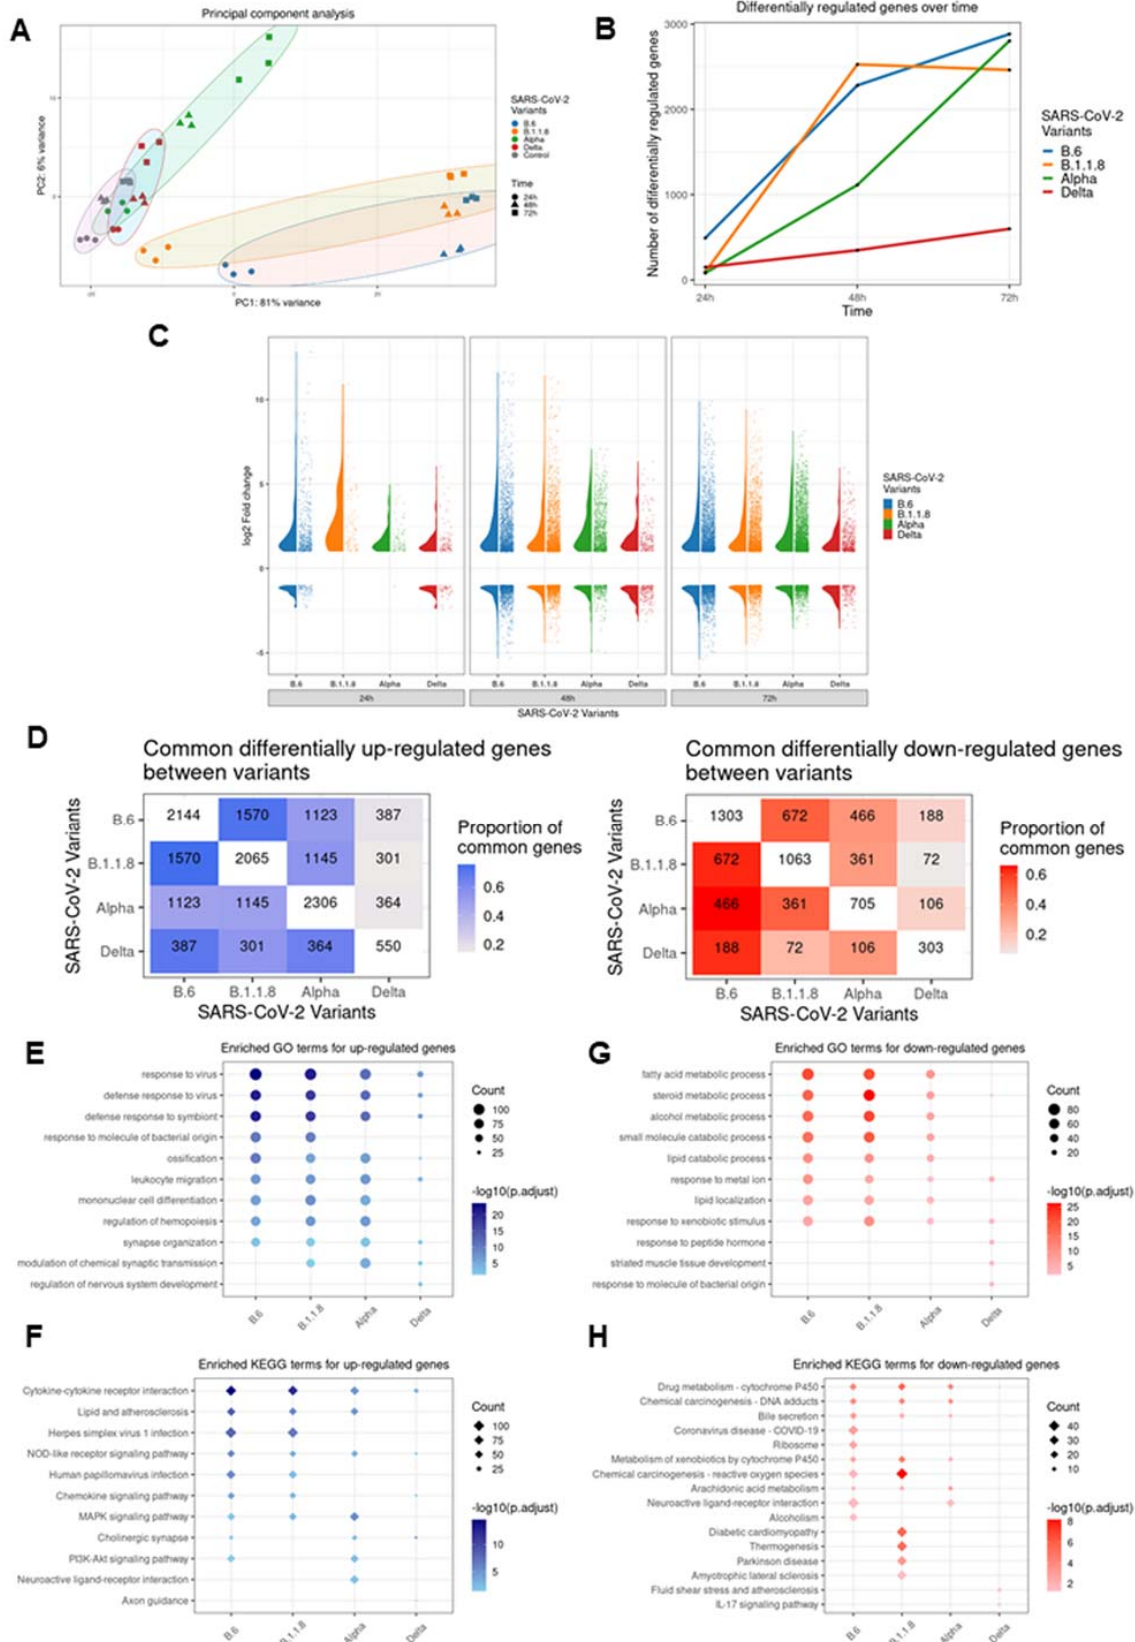

686

687 Figure 6

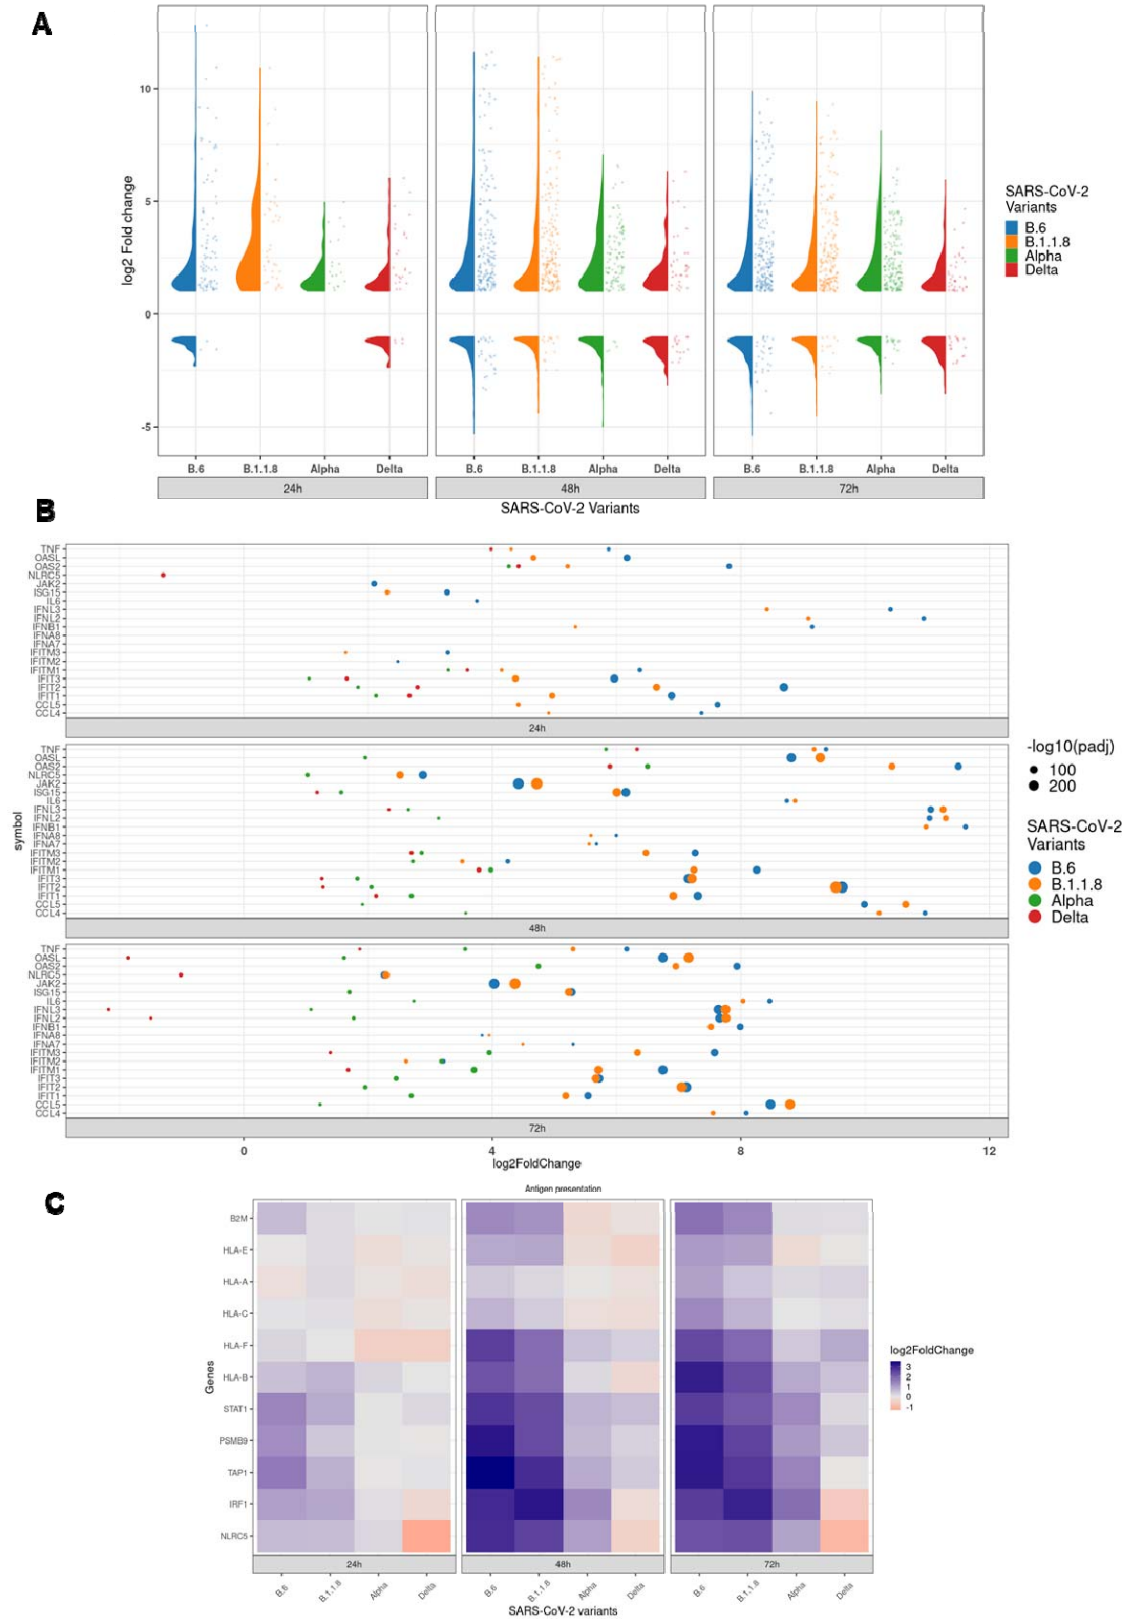

688

689

690

691 Figure 7  
692

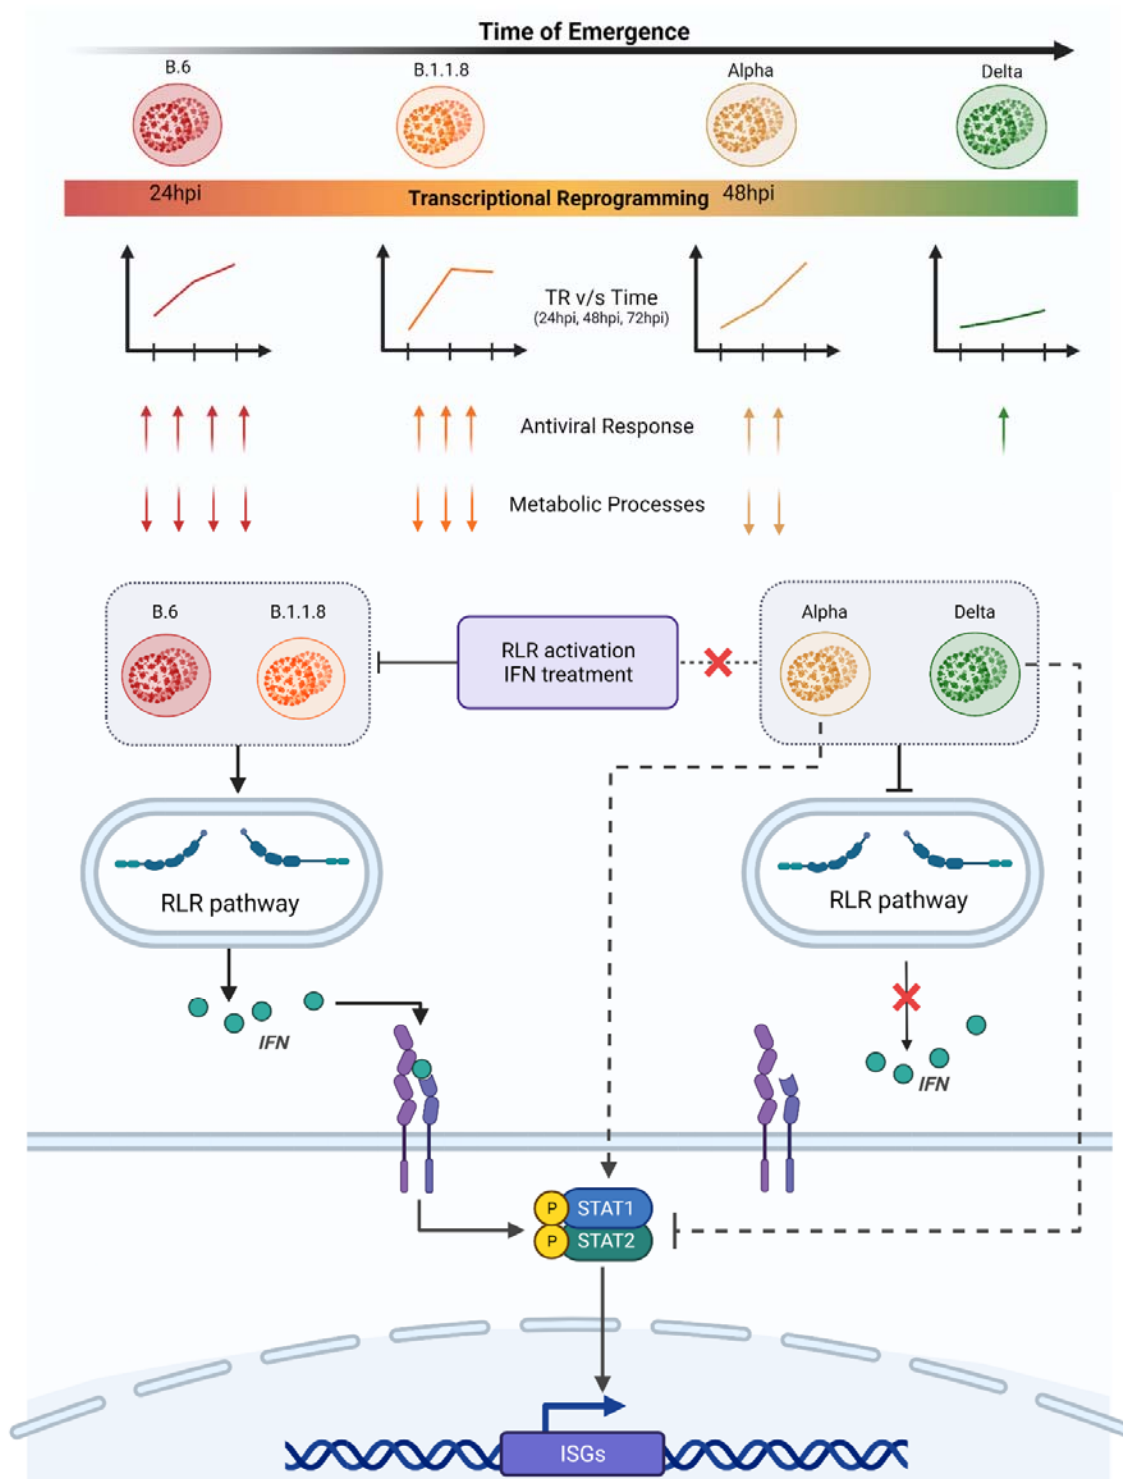

693  
694  
695  
696

697 **LEGENDS**

698

699 **Figure 1. Delta has the highest RNA replication efficiency, but also has low**

700 **infectious titers.** (A) Schematic representing the mutations found in the five distinct

701 variant isolates compared with the ancestral Wuhan isolate. The timescale on the top

702 represents the month of the first reporting of the variant in GISAID. (B) Intracellular

703 SARS-CoV-2 RNA quantified by real-time qRT-PCR detection of viral RdRp region.

704 Caco2 cells were infected with 1 MOI of one of the five distinct variant isolates and

705 incubated for the specific time-intervals as shown in the graph. The cells were

706 harvested, RNA prepared from which SARS-CoV-2 RNA were analyzed by real-time

707 qRT-PCR. The fold-changes against the mock-infected samples were generated

708 through  $\Delta\Delta$ -Ct method by normalizing against the internal control *RNase P* of the

709 corresponding sample. and have been plotted in the graph. (C) SARS-CoV-2 RNA in

710 the culture supernatants quantified by real-time qRT-PCR detection of viral RdRp

711 region. As in 1B, the fold-changes in the levels were plotted against the mock-

712 infected samples for individual time points and normalized against *RNase P* values.

713 (D) Infectious titers of SARS-CoV-2 from culture supernatants infected with the

714 distinct variant isolate, determined by PFA. The culture supernatants collected at

715 specific time-interval post-infection were cleared of the debris and were serially

716 diluted and used as inoculum to infect fresh monolayers of Vero cells. The infected

717 wells were layered with Agarose and the plaques formed were identified by staining

718 with crystal violet. All the graphs contain results from biological triplicates. (E)

719 Immunoblots detecting the levels of SARS-CoV-2 S and N proteins in the cells

720 infected with the respective variant at specific time-interval. All graphs were prepared

721 using GraphPad Prism version 8.0.2. Statistical significance is represented as \*, \*\*,

722 and \*\*\* for  $p < 0.05$ ,  $p < 0.01$  and  $p < 0.005$  respectively.



723 **Figure 2. Delta infection causes long-term and complete suppression of RLR**  
724 **and JAK-STAT pathways.** (A) Immunoblot images demonstrating the  
725 phosphorylation of IRF3 and STAT1 along with the expression of ISGs IFIT1 and  
726 MDA5 in Caco2 cells infected separately with one of the five variant isolates. (B)  
727 qRT-PCR quantification of *IFNB1* transcripts in cells infected with the individual  
728 variants. (C) Similar quantification for *IFNL1* transcripts. (D) Densitometric  
729 quantification of the phosphorylation of STAT1 across the infected samples. (E and  
730 F) Densitometric quantification of IFIT1 and qRT-PCR analysis of its transcripts  
731 respectively (n=2). (G) Densitometric quantification of MDA5 expression and (H)  
732 qRT-PCR analysis of its transcripts. (I) qRT-PCR quantification of *DDX58* transcripts  
733 in individual infections. All the graphs are representatives of biological triplicates. All  
734 graphs were prepared using GraphPad Prism version 8.0.2. *GAPDH* was used as  
735 the normalization control for qRT-PCR. Statistical significance is represented as \*, \*\*,  
736 and \*\*\* for p<0.05, p<0.01 and p<0.005 respectively.

737

738 **Figure 3. Alpha and Delta are sensitive to RLR activation by poly (I:C).** (A)  
739 Schematic of the experimental set up for poly(I:C) treatment prior to variant  
740 infections. Caco2 cells were transfected with 500 ng/mL poly (I:C) for 6 h after which  
741 the transfection media replaced with growth media for incubation for another 6 h. At  
742 this point, the cultures were infected with 1 MOI of individual variant with 3 h of  
743 inoculation followed by further incubation in virus-free medium for a total of 24 h  
744 infection. (B) Immunoblots of the samples prepared from the infection for analyzing  
745 JAK-STAT activation. (C) *IFNB1* quantification in poly(I:C) treated, infected samples  
746 against the untreated, infected samples by qTR-PCR. The values are represented as  
747 fold-changes. First, fold-changes from the infected samples against the mock-

748 infected samples were generated through  $\Delta\Delta$ -Ct method by normalizing against the  
749 internal control *GAPDH* of the the corresponding sample. Subsequently, fold-  
750 changes of such values generated in the poly (I:C) treated, infected samples against  
751 the untreated samples were calculated and plotted in the graph. (D-F) Densitometric  
752 quantification of the STAT1 phosphorylation and expressions of IFIT1, and MDA5.  
753 (G) SARS-CoV-2 RNA levels in the supernatants of poly (I:C) treated, infected  
754 samples measured by qRT-PCR and represented as fold-changes against the  
755 values from the respective untreated, infected samples. First, fold-changes from the  
756 infected samples against the mock-infected samples were generated through  $\Delta\Delta$ -Ct  
757 method by normalizing against the internal control *RNase P* of the the corresponding  
758 sample. Subsequently, fold-changes of such values generated in the poly (I:C)  
759 treated, infected samples against the untreated samples were calculated and plotted  
760 in the graph. (H) Infectious titers of SARS-CoV-2 in the supernatant of poly (I:C)  
761 treated, infected samples measured by PFA. All the graphs are representatives of  
762 biological triplicates. All graphs were prepared using GraphPad Prism version 8.0.2.  
763 Statistical significance is represented as \*, \*\*, and \*\*\* for  $p < 0.05$ ,  $p < 0.01$  and  
764  $p < 0.005$  respectively.

765

766 **Figure 4. Alpha and Delta show resistance to IFN.** (A) Schematic of the  
767 experimental set up for IFN- $\alpha$  treatment prior to variant infections. 2 h prior to IFN- $\alpha$   
768 treatment, Caco2 cells were incubated with SFD. IFN- $\alpha$  containing SFD was added  
769 to the cells at a concentration of 500 U/mL of IFN- $\alpha$ , and further incubated for 4 h.  
770 Cells were infected in SFD in the absence of IFN- $\alpha$  for 3 h after which the inoculum  
771 was replaced with grown media containing IFN- $\alpha$  and incubated until 24 hpi. (B)  
772 Analysis of the JAK-STAT pathway activation following IFN- $\alpha$  treatment by

773 immunoblotting STAT1 phosphorylation and expressions of IFIT1 and MDA5. (C-E)  
774 Measurement of STAT1 phosphorylation and expressions of IFIT1, and MDA5 by  
775 densitometry. (F) Measurement of SARS-CoV-2 RNA levels in the supernatants of  
776 IFN- $\alpha$  treated, infected samples by qRT-PCR, which is represented as fold-changes  
777 against the values from the respective untreated, infected samples. As in Figure 3G,  
778 fold-changes from the infected samples against the mock-infected samples were  
779 generated first through  $\Delta\Delta$ -Ct method by normalizing against the internal control  
780 *RNase P* of the corresponding sample. Subsequently, fold-changes of such values  
781 generated in the poly (I:C) treated, infected samples against the untreated samples  
782 were calculated and plotted in the graph. (G) Infectious titers of SARS-CoV-2 in the  
783 supernatant of IFN- $\alpha$  treated, infected samples measured by PFA. All graphs were  
784 prepared using GraphPad Prism version 8.0.2. Statistical significance is represented  
785 as \*, \*\*, and \*\*\* for  $p < 0.05$ ,  $p < 0.01$  and  $p < 0.005$  respectively.

786

787 **Figure 5. Gene expression profiling in response to SARS-CoV-2 variants.**

788 Total RNA isolated from Caco2 cultures infected with distinct variants for the  
789 respective time-intervals were subjected to next-generation sequencing. Three  
790 biological replicates were used for library generation and sequencing. The  
791 sequences generated were analyzed by PCA. All DEGs considered had Log2 fold-  
792 changes  $> 1$  for the up-regulated and  $< -1$  for the down-regulated genes, with *p*  
793 *adjacent* value  $< 0.05$ . (A) PCA analysis of the sequences generated. Regularized log  
794 transformed count data was used for computing principal components. The PCA  
795 confirms the quality of data where biological replicates clustered together. From the  
796 control samples, maximum variance was observed for B.6, B.1.1.8 followed by Alpha  
797 (B) Line graphs showing the total number of differentially expressed genes in

798 response to individual variant at the specified time points. The number represents  
799 sum of both up- and down-regulated genes. (C) Violin plots representing the  
800 distribution of log<sub>2</sub>-fold changes and jitter plot representing number of DEGs in  
801 response to different variants at each time-points. (D) Heat-maps representing the  
802 overlapping DEGs across time-points between variant-infected samples in x-axis and  
803 y-axis. The numbers in diagonal boxes represent the total number of statistically  
804 significant up- or down-regulated genes in the corresponding samples. The up-  
805 regulated genes are represented in blue boxes while the down-regulated ones are in  
806 red. The color intensity represents the proportion of DEGs for the variants in y-axis  
807 overlapping with DEGs for the variants in the x-axis. (E and F) Enrichment analysis  
808 representing the Enriched GO (circles) and KEGG (diamond) terms for up-regulated  
809 DEGs for each variant-infected sample across time-points. Size of the dot is  
810 proportionate to the number of DEGs representing the enriched term and the  
811 intensity of the color represents the -log<sub>10</sub> (adjusted p-value) of the DEGs  
812 represented. (G and H) Similar enrichment analysis for down regulated genes  
813 caused by infection by individual variants. The up-regulated DEGs are represented  
814 in blue color while the down-regulated ones are in red.

815

816 **Figure 6. Activation of antiviral immune genes is severely suppressed in Delta**  
817 **infection.** (A) Violin plot representing the distribution of log<sub>2</sub> fold-change and dot plot  
818 representing number of differentially expressed genes annotated for antiviral  
819 functions for specified time points. (B) Jitter plot representing the log<sub>2</sub> fold-change of  
820 20 select genes participating in the innate immune response. Size of the dot  
821 represents the -log<sub>10</sub> adjusted p-value. (C) Heat-maps representing log<sub>2</sub> fold

822 change of DEGs participating in antigen presentation in response to the individual  
823 variants at the specified time-points.

824

825 **Figure 7. Delta variant has gained highly advanced control over the innate**

826 **immune response and suppresses host responses effectively.** The variants

827 emerged during the early part of COVID-19 trigger moderate immune response by

828 24 h and robust response by 48 h post-infection. This was evident by the activation

829 of RLR pathway that was further substantiated by transcriptome data. However,

830 Alpha suppresses RLR pathway effectively, but failed to suppress STAT1

831 phosphorylation, possibly through IFN-independent mechanism. This was reflected

832 in the late surge of transcriptional activities in Alpha infection. Delta has been the

833 most advanced in suppressing not just innate immune response, but host response

834 in general. Delta suppressed RLR pathway, IFN production and STAT1

835 phosphorylation, and this was reflected in the modest, steady response from the

836 infected cells throughout the infection period. SARS-CoV-2 variants used in this

837 study were presented based on their time of emergence from left to right with B.6

838 being the earliest and Delta being the most recent of them. The color of the variant

839 virus particle shown in the schematic directly correlates with degree of transcriptional

840 reprogramming by variants presented in graphical depiction below individual

841 variants. The color intensity of the rectangular bar represents transcriptional

842 reprogramming and control over host immune response by individual variant. Red

843 represents elevated TR and strong activation of immune response while green

844 represents lenient TR and greater control over host responses. Two of the GO

845 enriched terms were presented with arrows. The numbers of arrows represent the

846 potency of activation or inhibition, where up arrows indicate up-regulation of DEGs

847 involved while down arrows indicate down-regulation. The variants studied here  
848 broadly fall under two groups based on the regulation of RLR pathway components  
849 and their response to activated innate immune responses (RLR activation by Poly  
850 I:C and JAK-STAT activation by IFN treatment). B.6 and B.1.1.8 activated RLR  
851 signalling followed by IFN secretion and ISGs expression via JAK-STAT axis. RLR  
852 and JAK-STAT signaling remain suppressed in Delta infection. Uniquely Alpha  
853 follows non-canonical mode of STAT activation without any detectable expression of  
854 IFNs.

855  
856  
857  
858  
859  
860  
861  
862  
863  
864  
865  
866  
867  
868  
869  
870  
871  
872  
873  
874  
875  
876  
877  
878  
879  
880  
881  
882  
883  
884  
885  
886

887 **Supplementary Figures**

888

889 **Supplementary Figure 1**

890

891

892

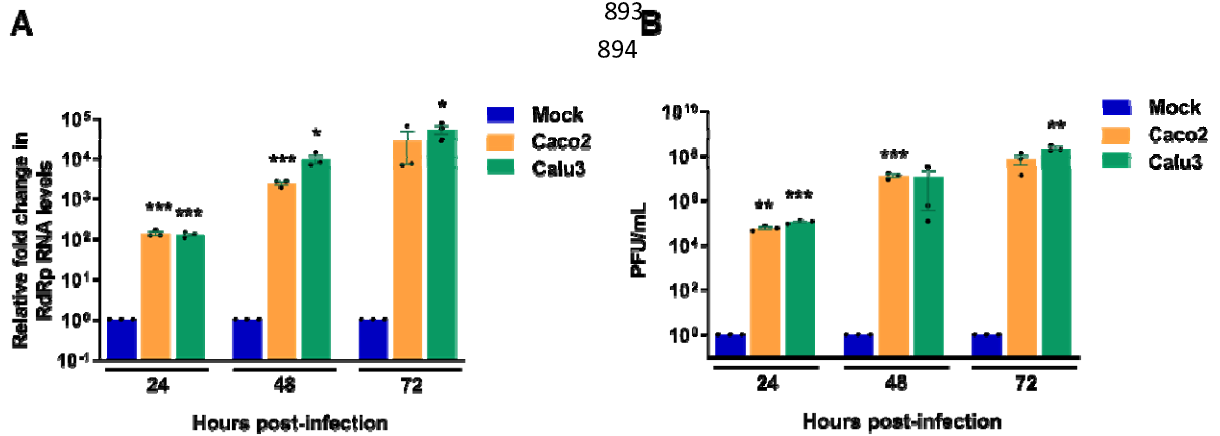

896

897

898

899

900

901

902

903

904 **Supplementary Figure 1. Permissivity analysis for SARS-CoV-2 in Calu3 and Caco2**  
905 **cells. (A) Supernatants from Calu3 and Caco2 cultures infected with 1 MOI of B.1.1.8**  
906 **variant isolate of SARS-CoV-2 for 24-, 48- or 72 h were analyzed by real-time qRT-**  
907 **PCR to measure the genomic RNA of SARS-CoV-2. The fold-changes over the**  
908 **mock-infected samples were calculated by  $\Delta\Delta$ -Ct method and plotted in the graph.**  
909 **(B) Analysis of the infectious titers of SARS-CoV-2 in the supernatants generated in**  
910 **A, by PFA and represented in PFU/mL.**

911

912

913

914

915

916

917

918

919

920

921

922

923

924

925

926 Supplementary Figure 2

927

928

929

930

931

932

933

934

935

936

937

938

939

940

941

942

943

944

945

946

947

948

949

950

951

952

953

954

955

956

957

958

959

960

961

962

963

964

965

966

967

968

969

970

971

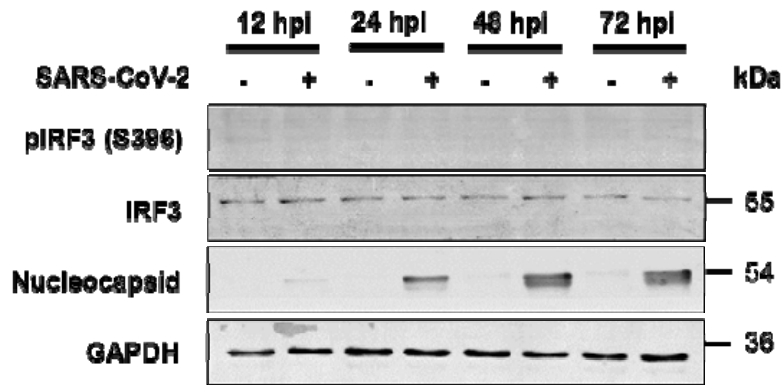

Supplementary Figure 2. IRF3 phosphorylation is suppressed in SARS-CoV-2 infected Calu3 cells. Calu3 cells were infected with 1 MOI of B.1.1.8 variant isolate of SARS-CoV-2 for various time-points as indicated in the figures. Cells harvested were lysed and subjected to immunoblotting to detect viral N and phosphorylated IRF3.



972 Supplementary Figure 3

973

974

975

976

977

978

979

980

981

982

983

984

985

986

987

988

989

990

991

992

993

994

995

996

997

998

999

1000

1001

1002

1003

1004

1005

1006

1007

1008

1009

1010

1011

1012

1013

1014

1015

1016

1017

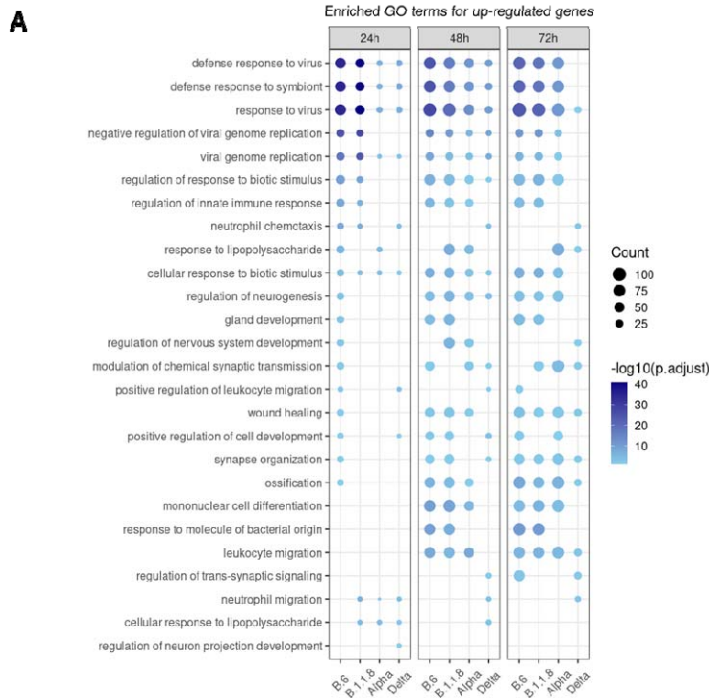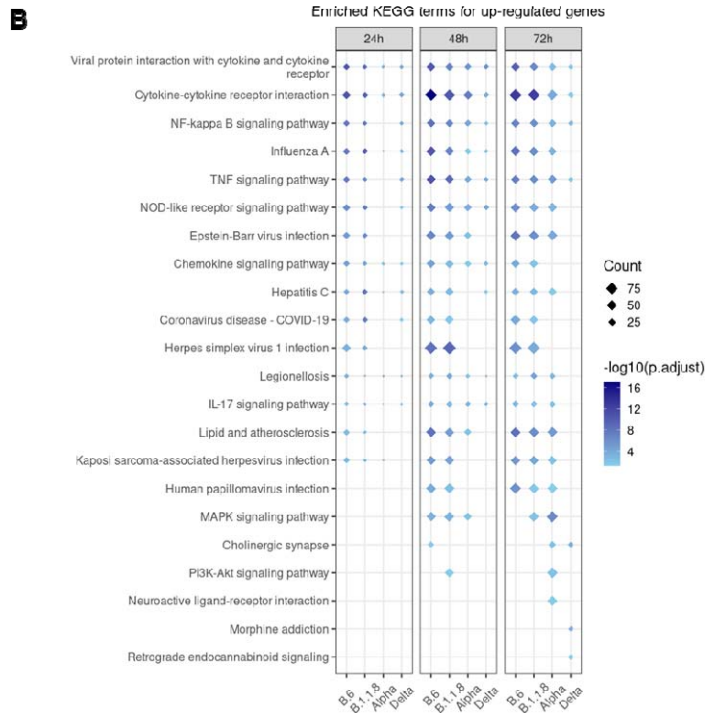

Supplementary Figure 3. Enrichment analysis representing the Enriched GO (circles) and KEGG (diamond) terms for up-regulated DEGs for each variant-infected samples at each time-points. Size of the dot represents the number of DEGs in the enriched term and the intensity of the color represents the  $-\log_{10}$  (adjusted p-value).

1018 Supplementary Figure 4

1019

1020

1021

1022

1023

1024

1025

1026

1027

1028

1029

1030

1031

1032

1033

1034

1035

1036

1037

1038

1039

1040

1041

1042

1043

1044

1045

1046

1047

1048

1049

1050

1051

1052

1053

1054

1055

1056

1057

1058

1059

1060

1061

1062

1063

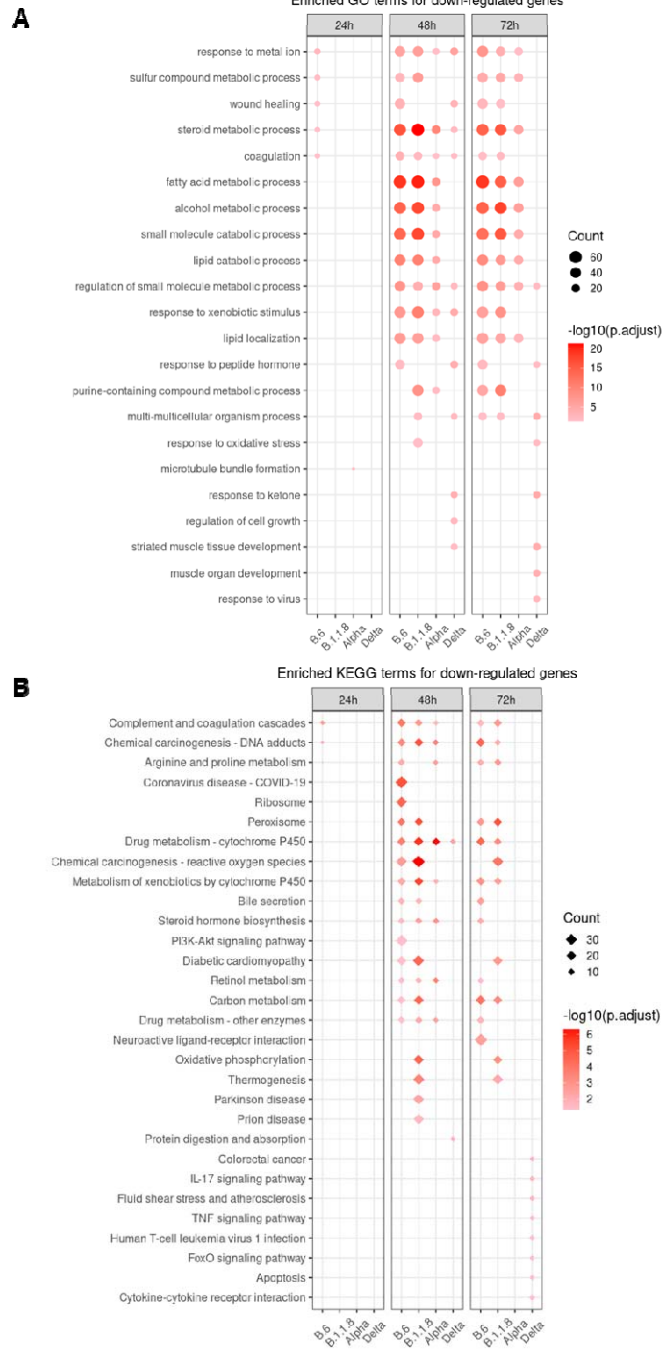

Supplementary Figure 4. (A and B) Enrichment analysis representing the Enriched GO (circles) and KEGG (diamond) terms for down-regulated DEGs for each variant-infected samples at each time-points. Size of the dot represents the number of DEGs in the enriched term and the intensity of the color represents the  $-\log_{10}$  (adjusted p-value).

1064 Supplementary Figure 5

1065

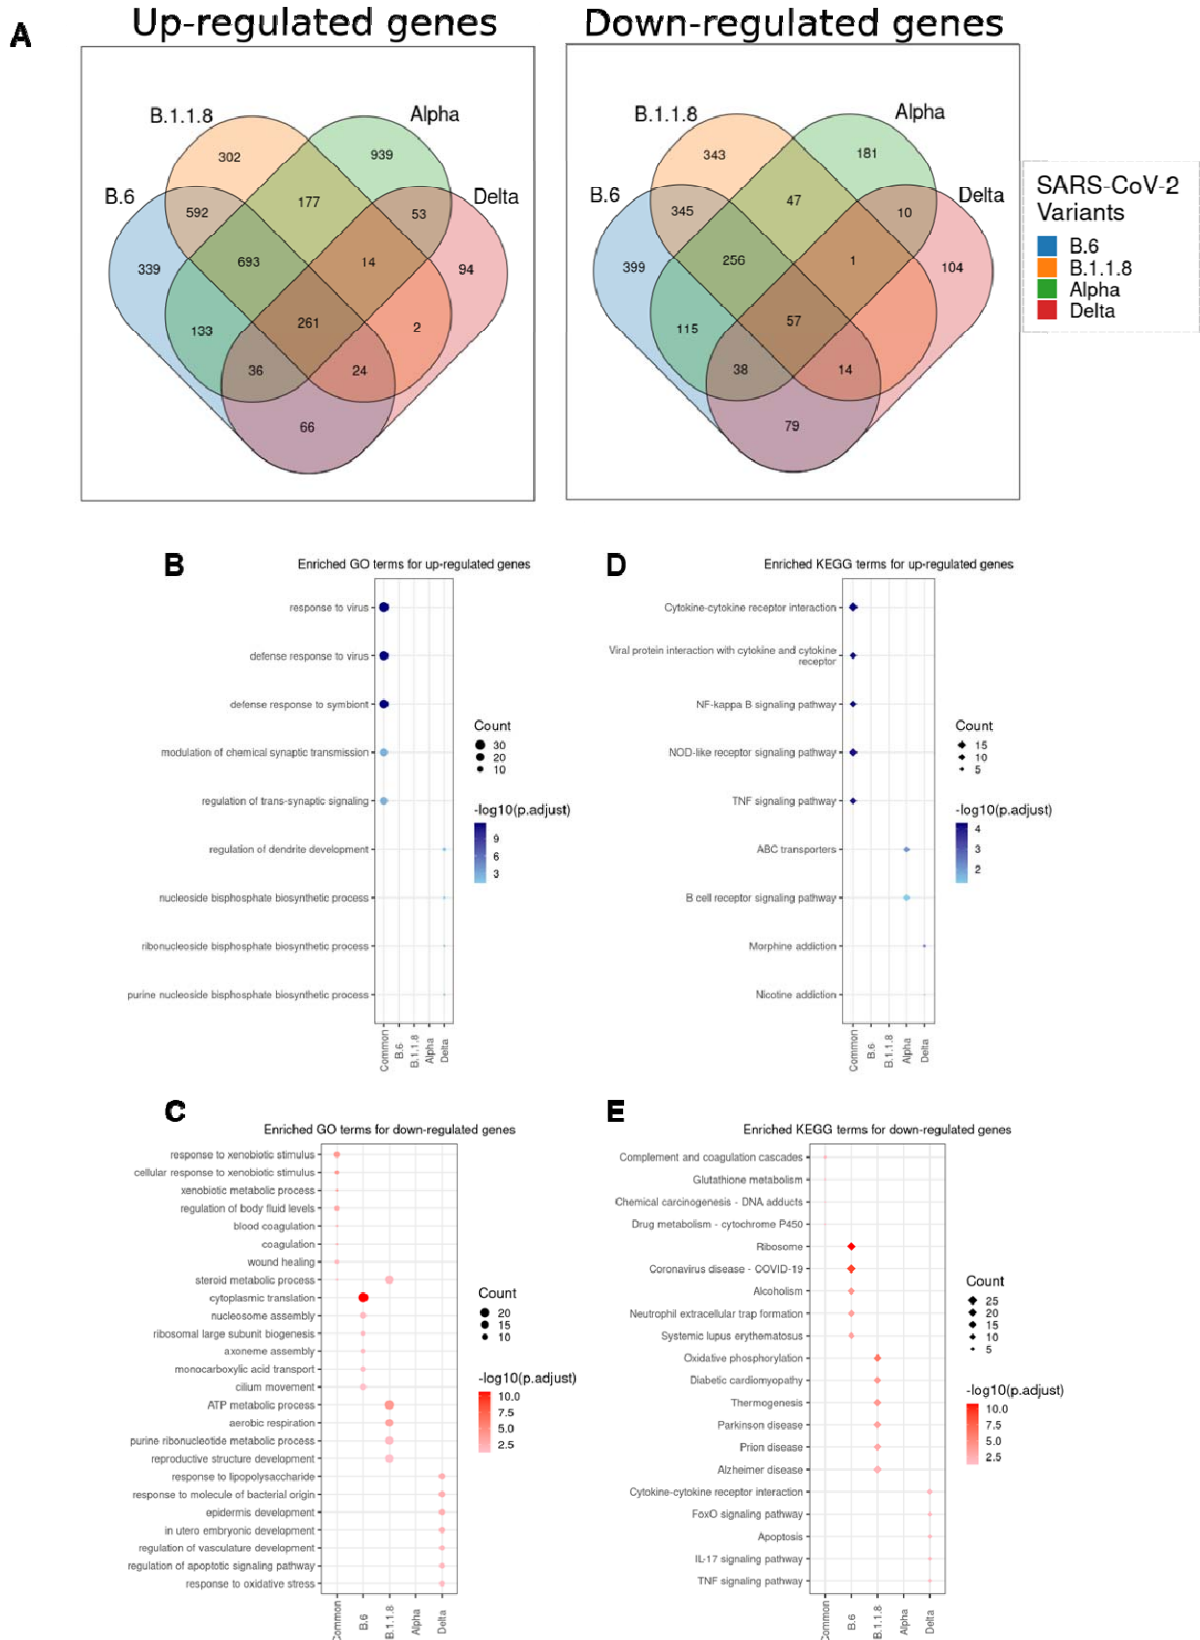

1066 Supplementary Figure 5. Analysis of the overlapping and unique DEGs from  
1067 individually infected samples. (A) Venn diagram showing the common genes that  
1068 were differentially regulated by all the four variants, as well as unique genes from  
1069 each individual infections, for both up-regulated and down-regulated sets. DEGs  
1070 were pooled from all time-points for each variant sample and used in the analysis.  
1071 (B-E) GO and KEGG enrichment analysis of the common and unique up and down  
1072 regulated DEGs from each infected samples  
  
1073  
  
1074

1075 Supplementary Figure 6

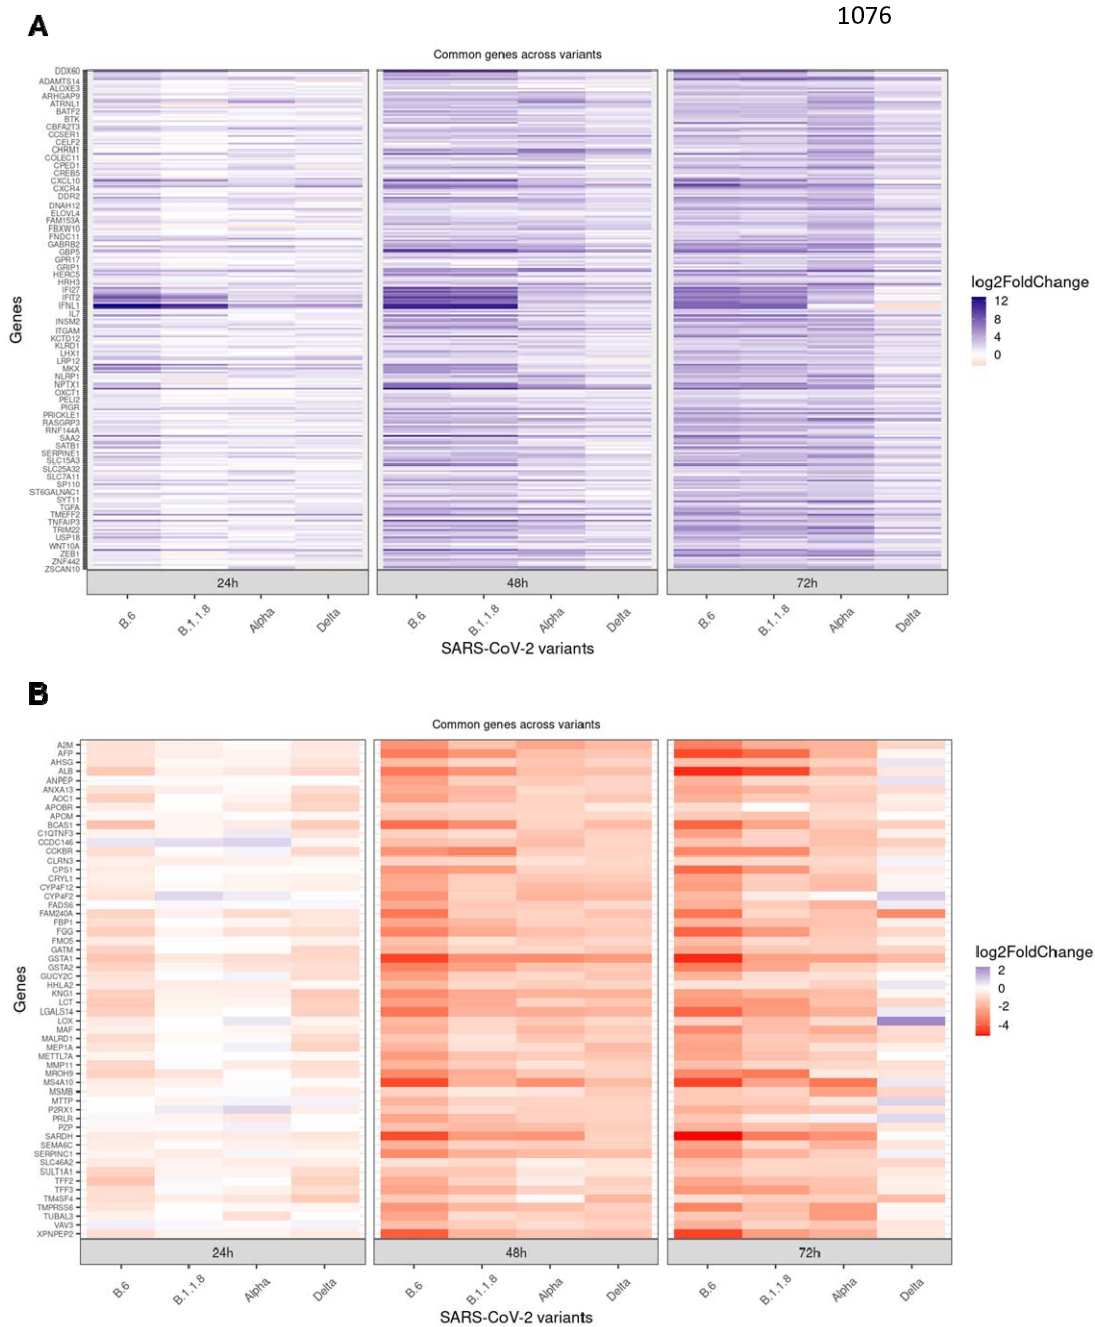

1077

1078 Supplementary Figure 6. Heat-maps demonstrating the log<sub>2</sub> fold change of (A) 261  
1079 up-regulated and (B) 57 down-regulated genes, common across the four variant  
1080 infections as shown in Figure 5A. The lists of genes were generated from the  
1081 common pool representing DEGs from all time-points as shown in Supplementary  
1082 Figure 5A.

1083 Supplementary Figure 7

1084

1085

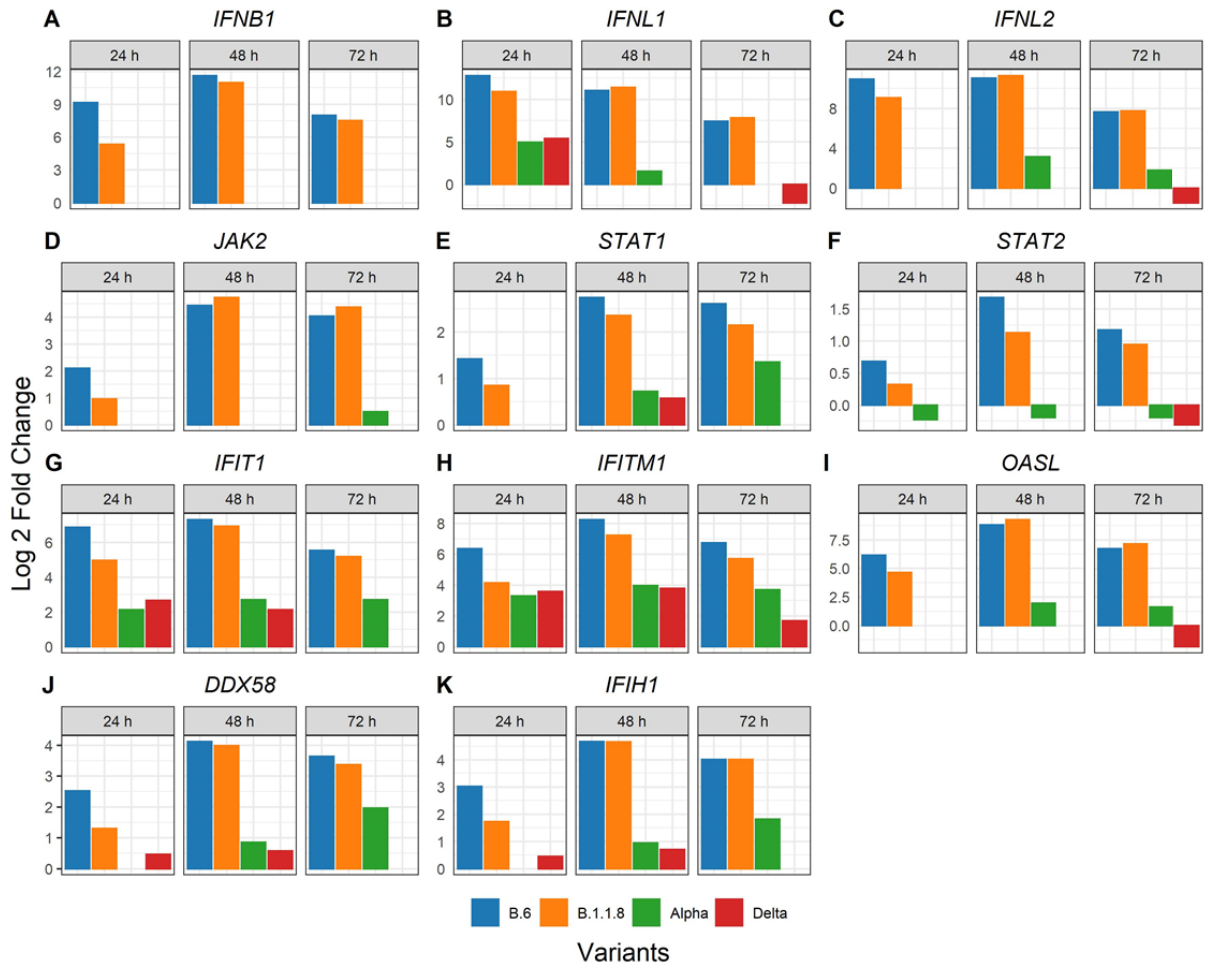

1086

1087

1088 Supplementary Figure 7. Bar-graphs demonstrating the differential expression of  
1089 select genes of importance from type-I and type-III IFN pathways. The graphs were  
1090 generated from the *p*-value adjusted list and are statistically significant.

1091

1092

1093

1094

1095

1096

1097

1098

1099

1100

1101

1102

1103 Supplementary Figure 8

**A**

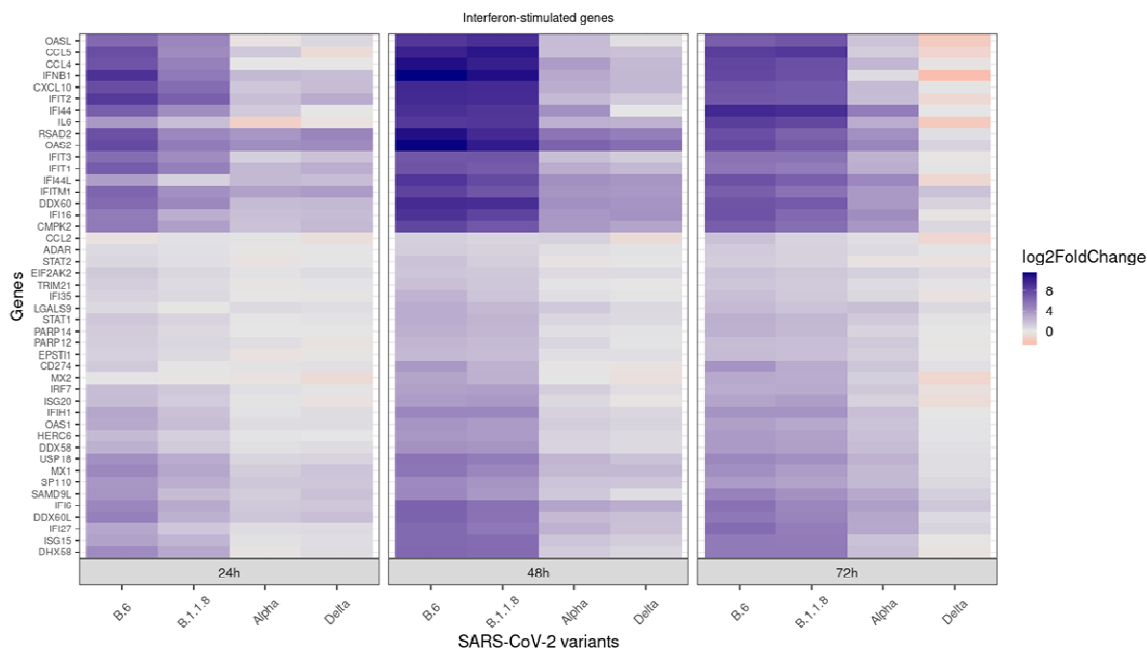

**B**

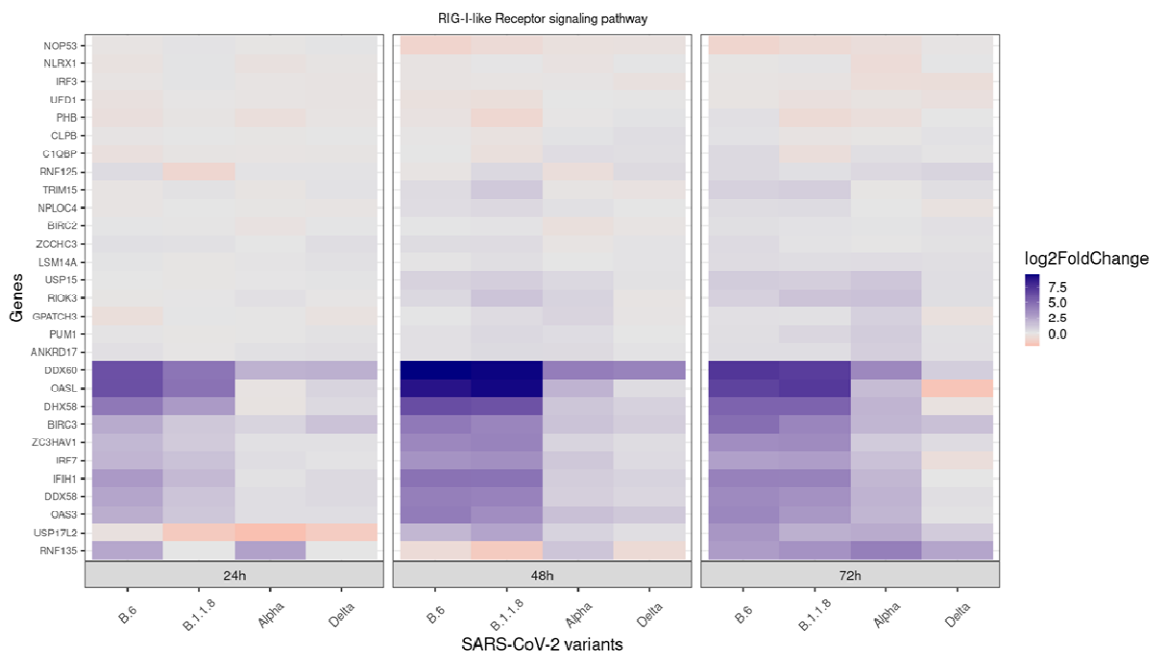

1104

1105

1106

1107 Supplementary Figure 8. (A) Heat-map demonstrating the differential expression of  
1108 ISGs in response to the variant infection at specified time-intervals. (B) Heat-map  
1109 demonstrating the differential expression of genes classified under RLR pathway in  
1110 response to the variant infection at specified time-intervals.

1111 Supplementary Figure 9

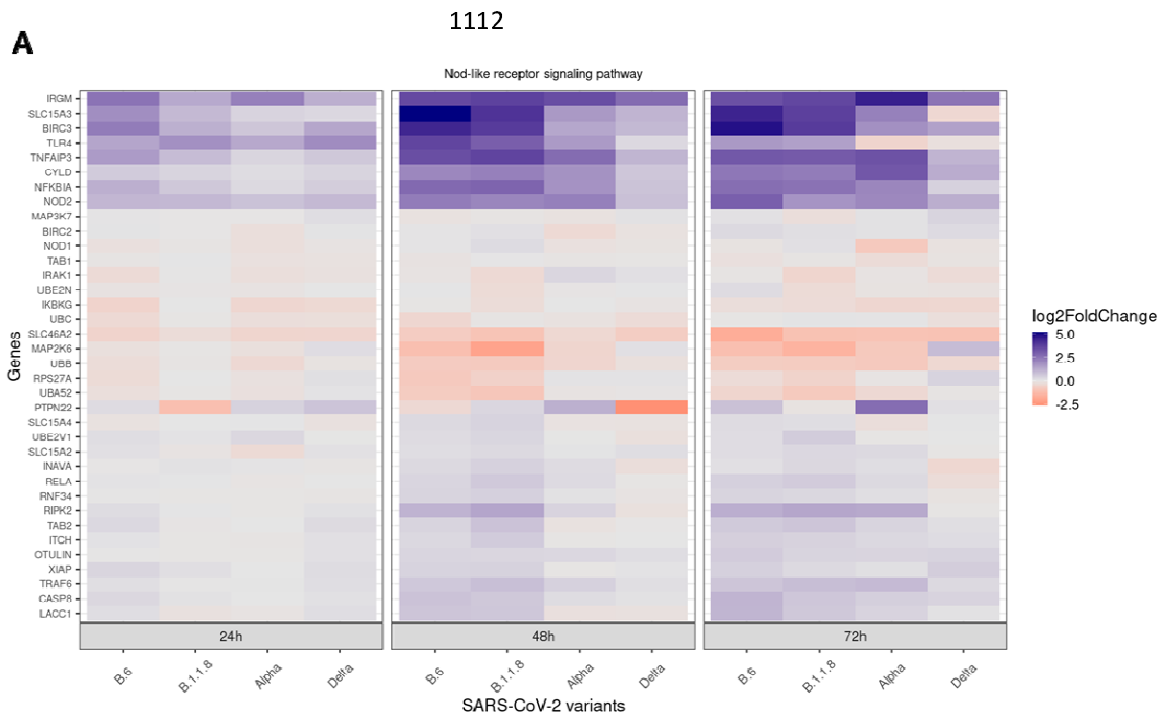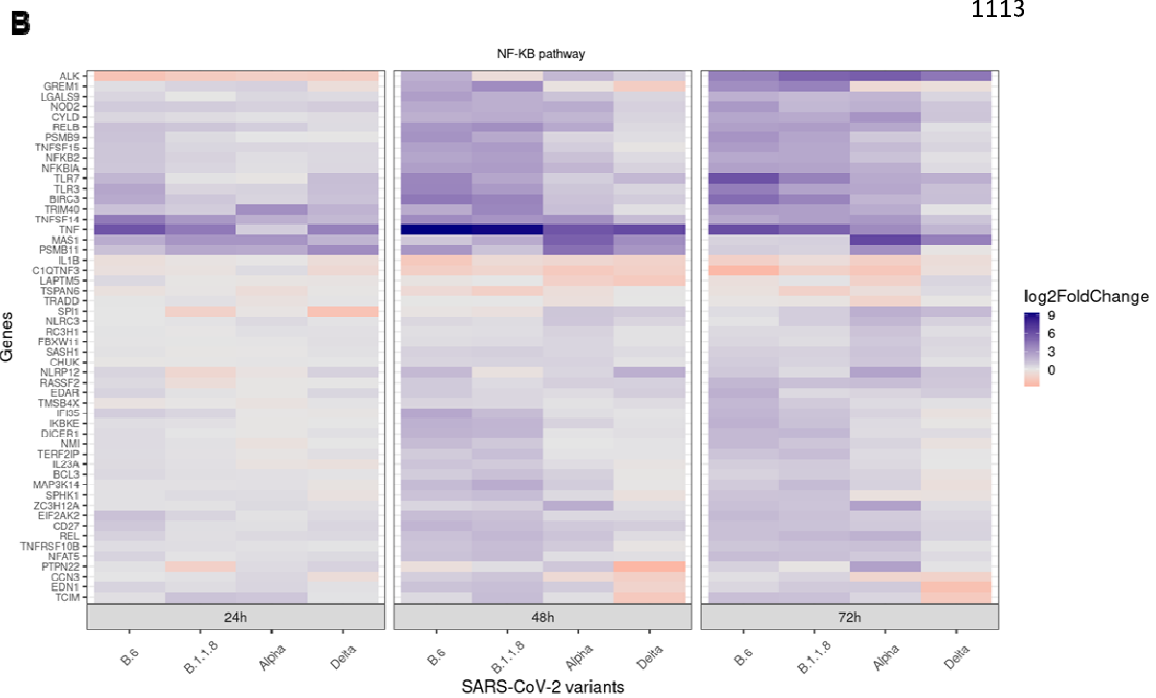

1114 Supplementary Figure 9. Heat-map demonstrating the differential expression of  
1115 genes classified under NLR pathway in response to the variant infection at specified  
1116 time-intervals. (B) Heat-map demonstrating the differential expression of genes  
1117 classified under NF-κB pathway in response to the variant infection at specified time-  
1118 intervals.

1119



1120 Supplementary Figure 10  
1121

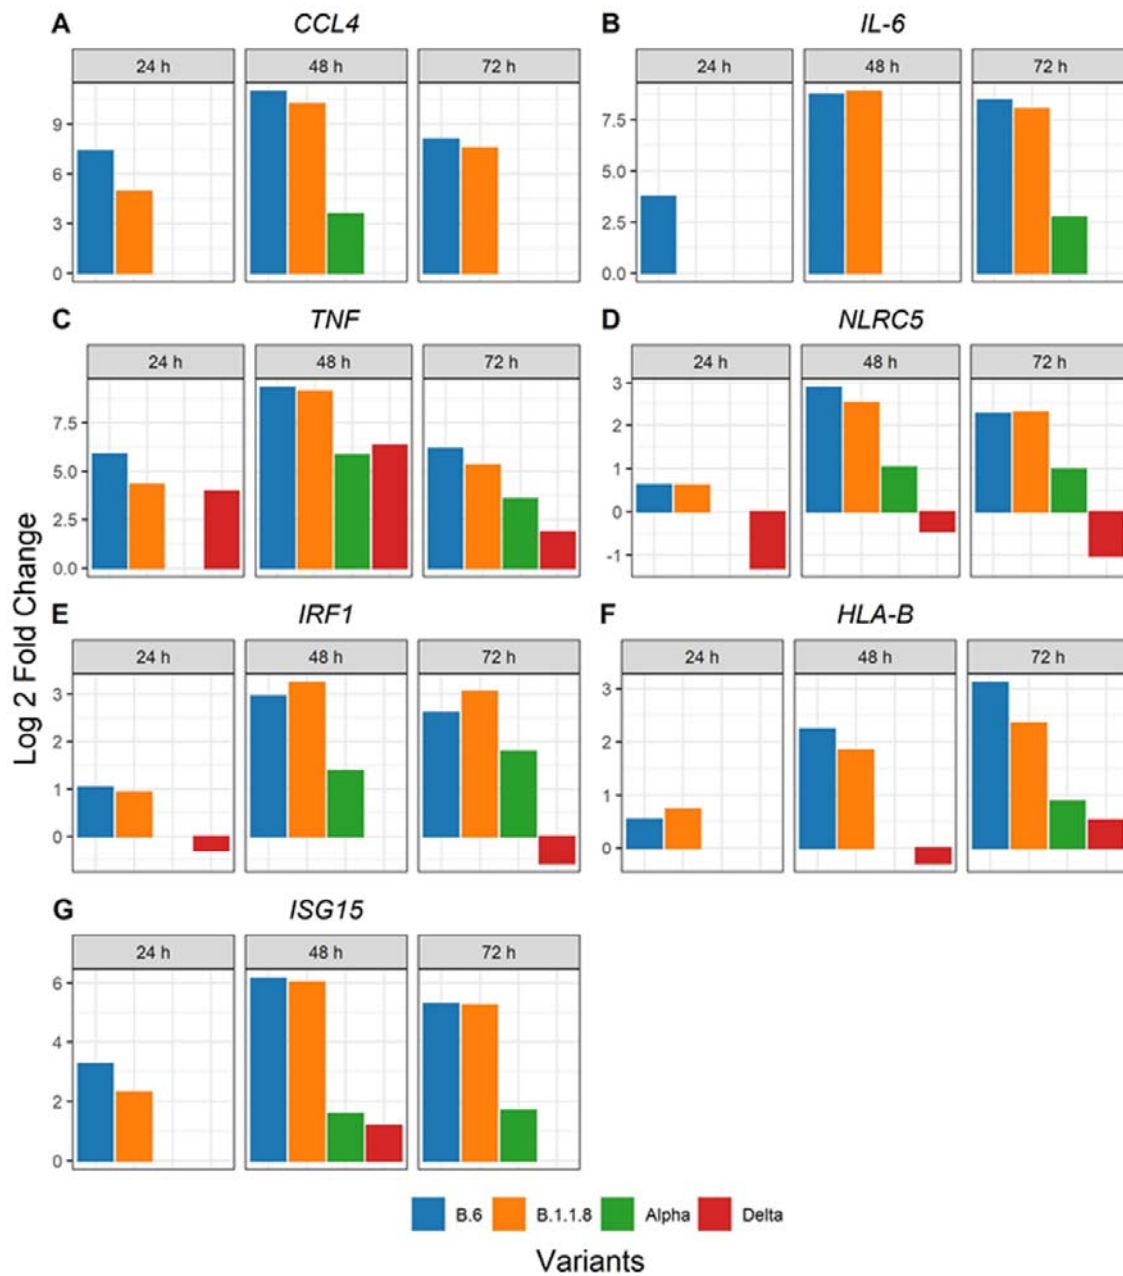

1122  
1123 Supplementary Figure 10. Bar-graphs demonstrating the differential expression of  
1124 select genes (A-F) participating in antigen presentation, and regulation of interferon  
1125 pathway (G, H). The graphs were generated from the *p*-value adjusted list and are  
1126 statistically significant.

1127  
1128  
1129  
1130

1131 Supplementary Figure 11

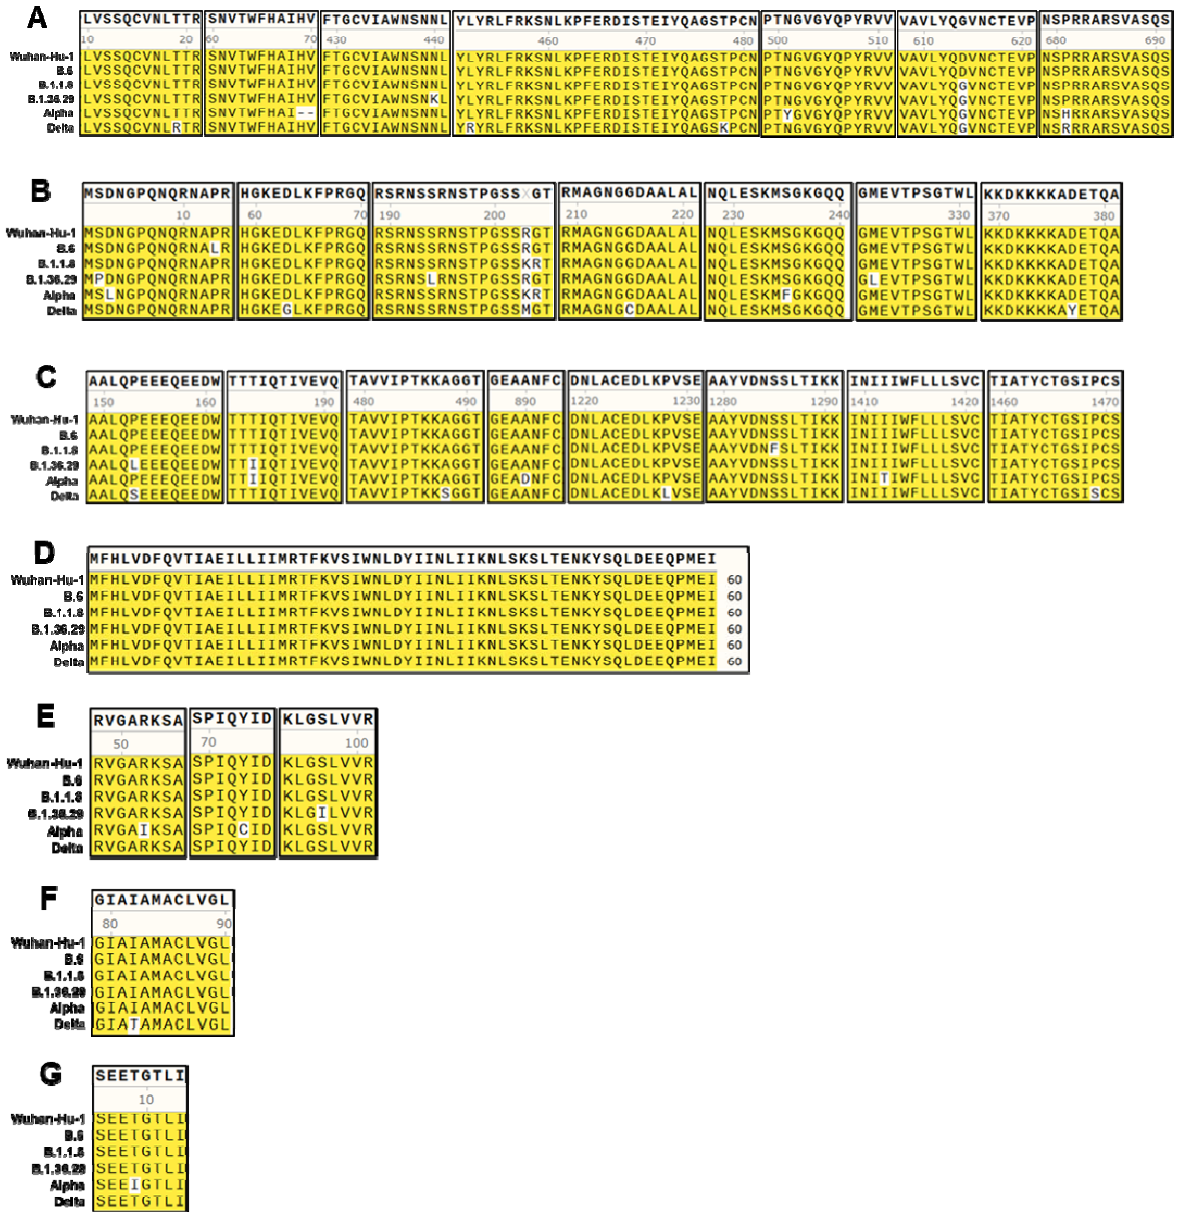

1132

1133 Supplementary Figure 11. Alignment of regions of various SARS-CoV-2 polypeptide  
 1134 sequences from the variants used in this study. (A: Spike; B: Nucleocapsid; C: Nsp3;  
 1135 D: ORF6; E: ORF8; F: Membrane; and G: Envelope)

1136

1137

1138
